# Supplementary material for: Stereoselective synthesis of a branched α-decaglucan
Source: Royal Society of Chemistry journal article supplement (doi:10.1039/d0ob01402h), 2020-01-01

## *Supporting Information*

*for*

### **Stereoselective Synthesis of a Branched $\alpha$ -Decaglucon**

Qingpeng Zhao,<sup>‡</sup> Han Zhang,<sup>‡</sup> Yanxin Zhang, Shihao Zhou, and Jian Gao\*

National Glycoengineering Research Center, Shandong Key Laboratory of Carbohydrate Chemistry and Glycobiology, Shandong University, Qingdao, Shandong 266237, China

<sup>‡</sup> These authors contributed equally.

\* Corresponding author. E-mail: jgao@sdu.edu.cn

### **Table of Contents**

|                                                                                   |             |
|-----------------------------------------------------------------------------------|-------------|
| <b>NMR and HR MS Spectra</b> -----                                                | Page S2-39  |
| <sup>1</sup> H, <sup>13</sup> C NMR and HR MS spectra of compound <b>11</b> ----- | Page S2-4   |
| <sup>1</sup> H, <sup>13</sup> C NMR and HR MS spectra of compound <b>8</b> -----  | Page S5-7   |
| <sup>1</sup> H, <sup>13</sup> C NMR and HR MS spectra of compound <b>9</b> -----  | Page S8-10  |
| 1D, 2D NMR and HR MS spectra of compound <b>3</b> -----                           | Page S11-15 |
| 1D, 2D NMR and HR MS spectra of compound <b>4</b> -----                           | Page S16-20 |
| 1D, 2D NMR and HR MS spectra of compound <b>5</b> -----                           | Page S21-25 |
| 1D, 2D NMR and HR MS spectra of compound <b>19</b> -----                          | Page S26-30 |
| 1D, 2D NMR and HR MS spectra of compound <b>2</b> -----                           | Page S31-35 |
| 1D, 2D NMR and HR MS spectra of compound <b>1</b> -----                           | Page S36-39 |

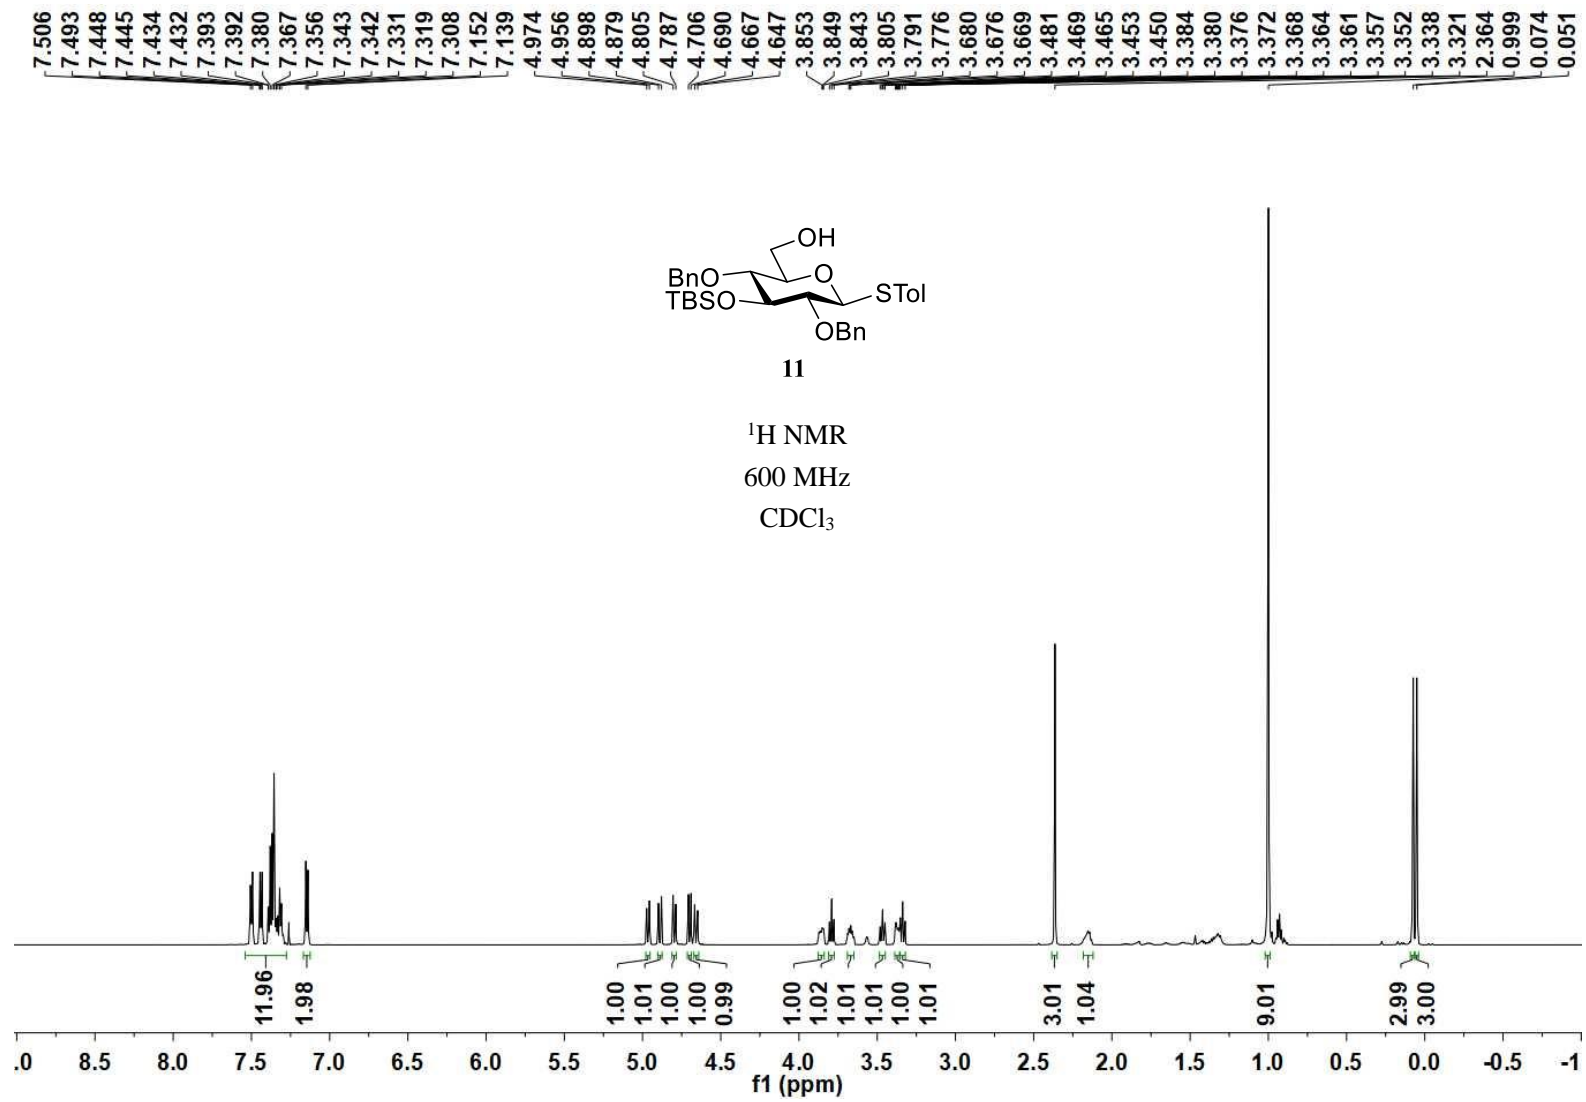

138.21  
138.04  
137.79  
132.23  
130.10  
129.80  
128.39  
128.22  
127.83  
127.67  
127.57  
127.54

88.22  
81.68  
79.26  
78.47  
78.42  
75.29  
74.96

62.08

26.13  
21.16  
18.01

-3.91  
-3.97

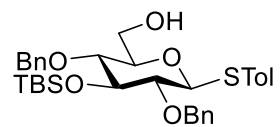

11

$^{13}\text{C}$  NMR

150 MHz

$\text{CDCl}_3$

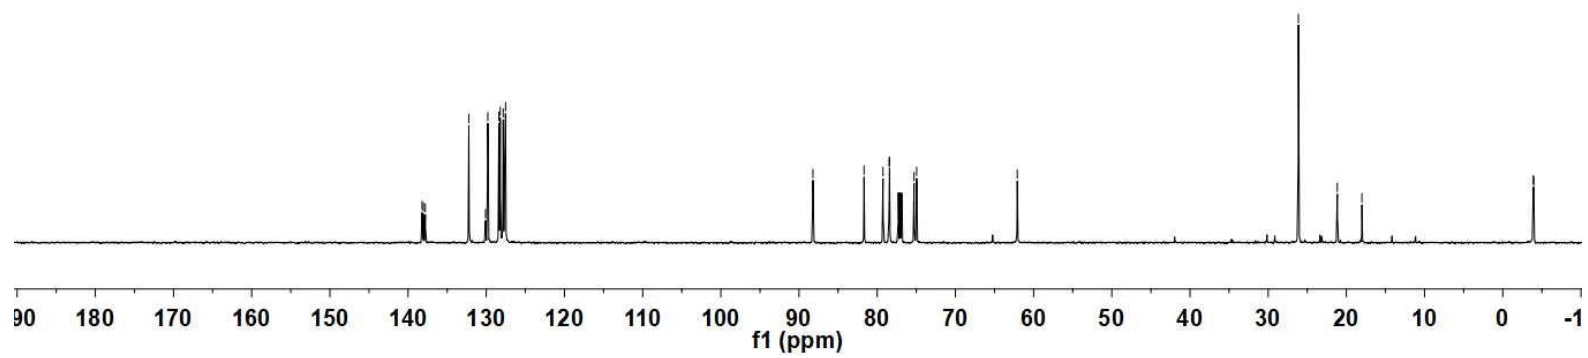

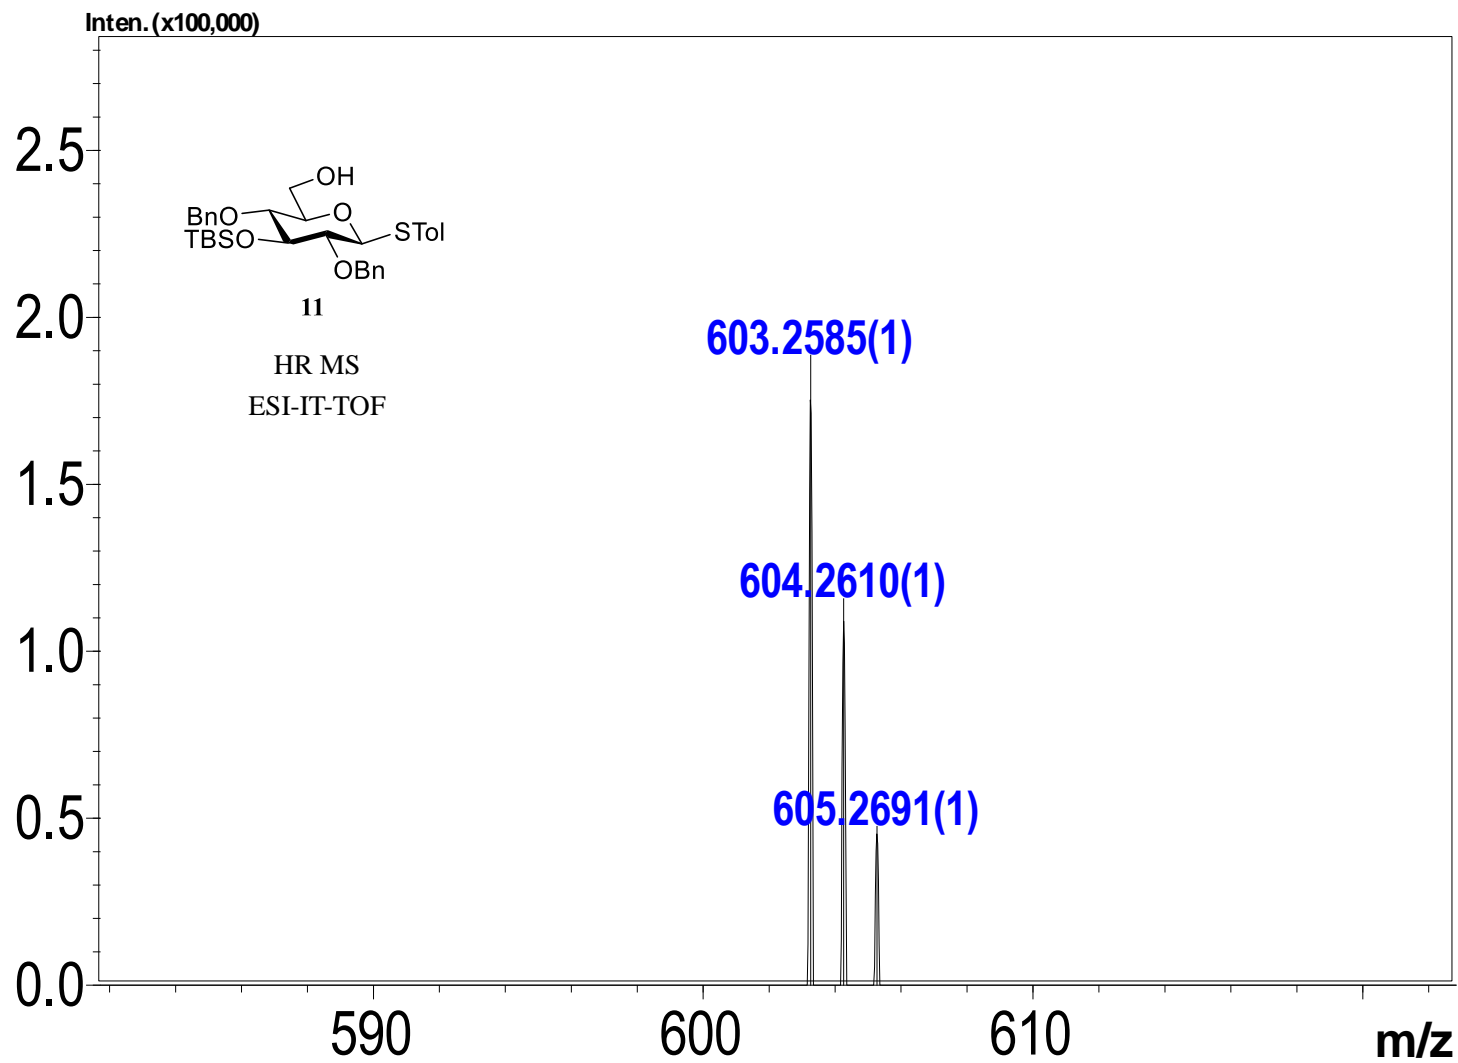

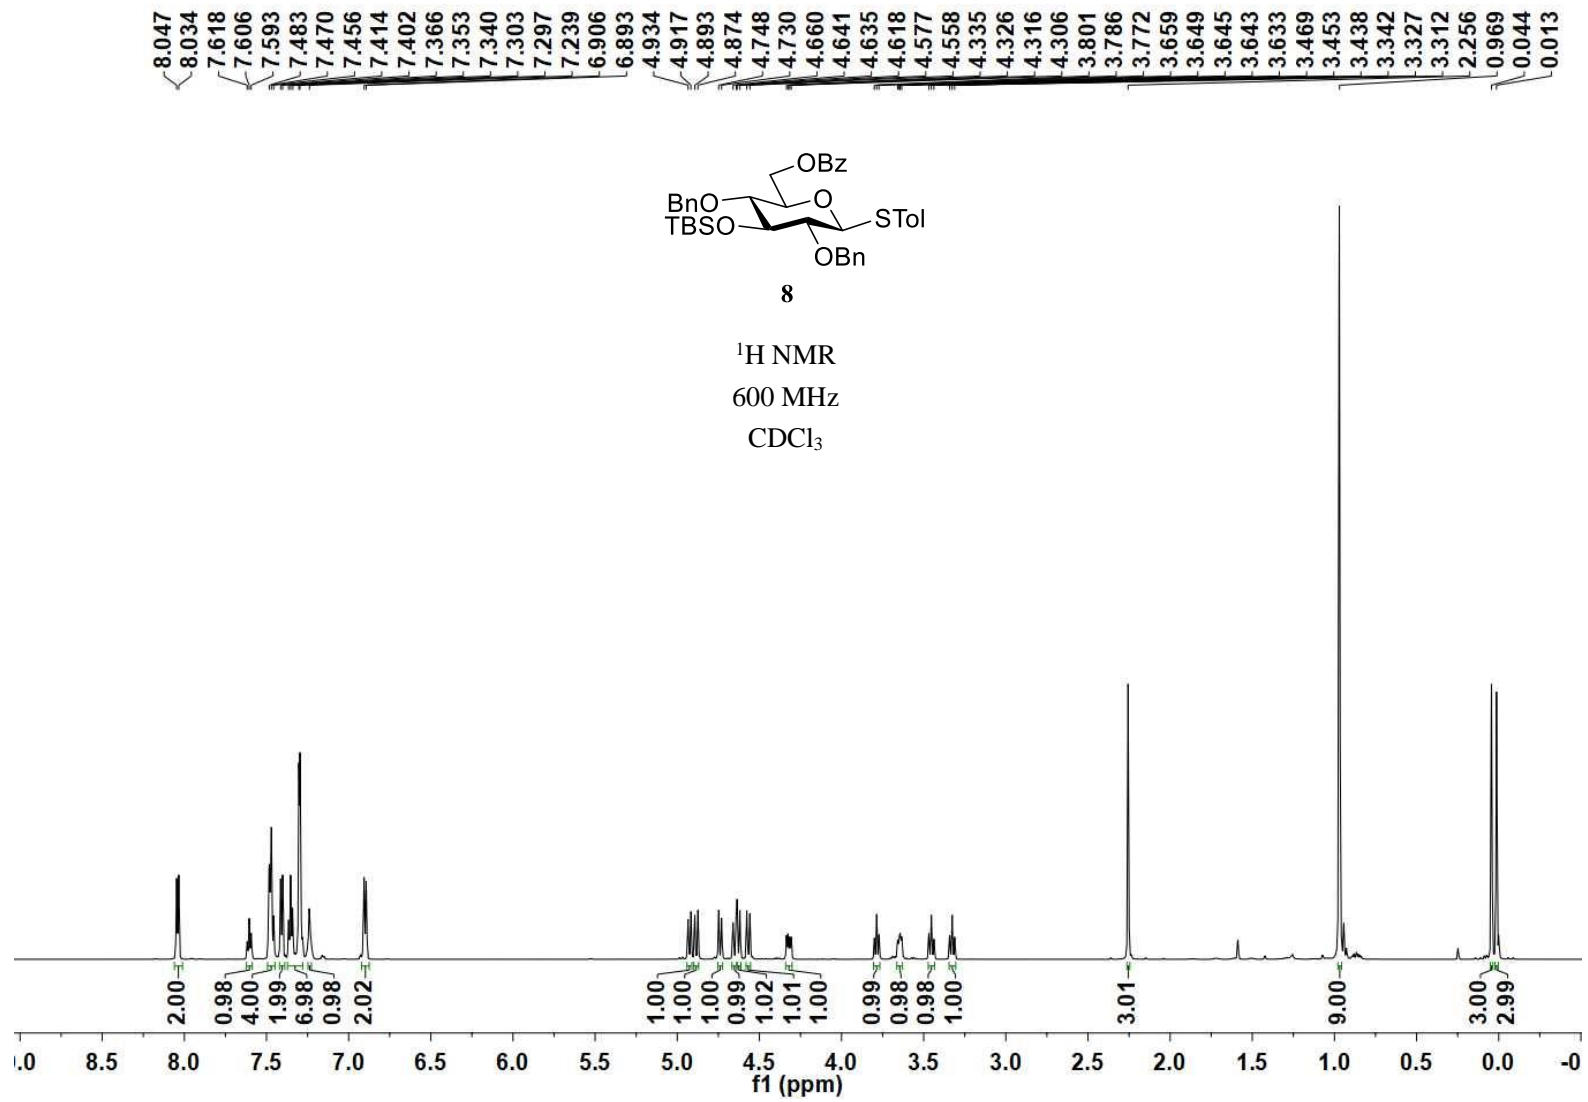

166.08  
138.20  
137.60  
137.53  
133.05  
132.55  
130.01  
129.83  
129.80  
129.58  
128.44  
128.36  
128.23  
127.83  
127.69  
127.59

87.90  
81.15  
78.80  
78.67  
76.97  
75.25  
75.19  
63.82

26.14  
21.14  
18.02

3.88  
-3.99

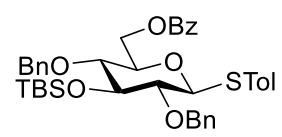

8

<sup>13</sup>C NMR  
150 MHz  
CDCl<sub>3</sub>

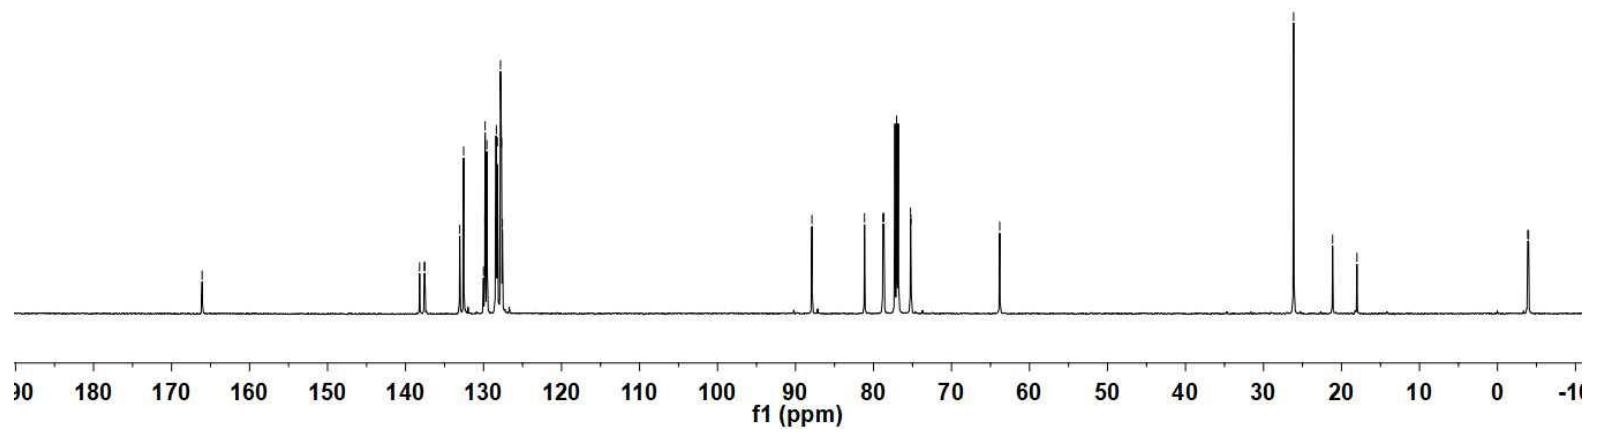

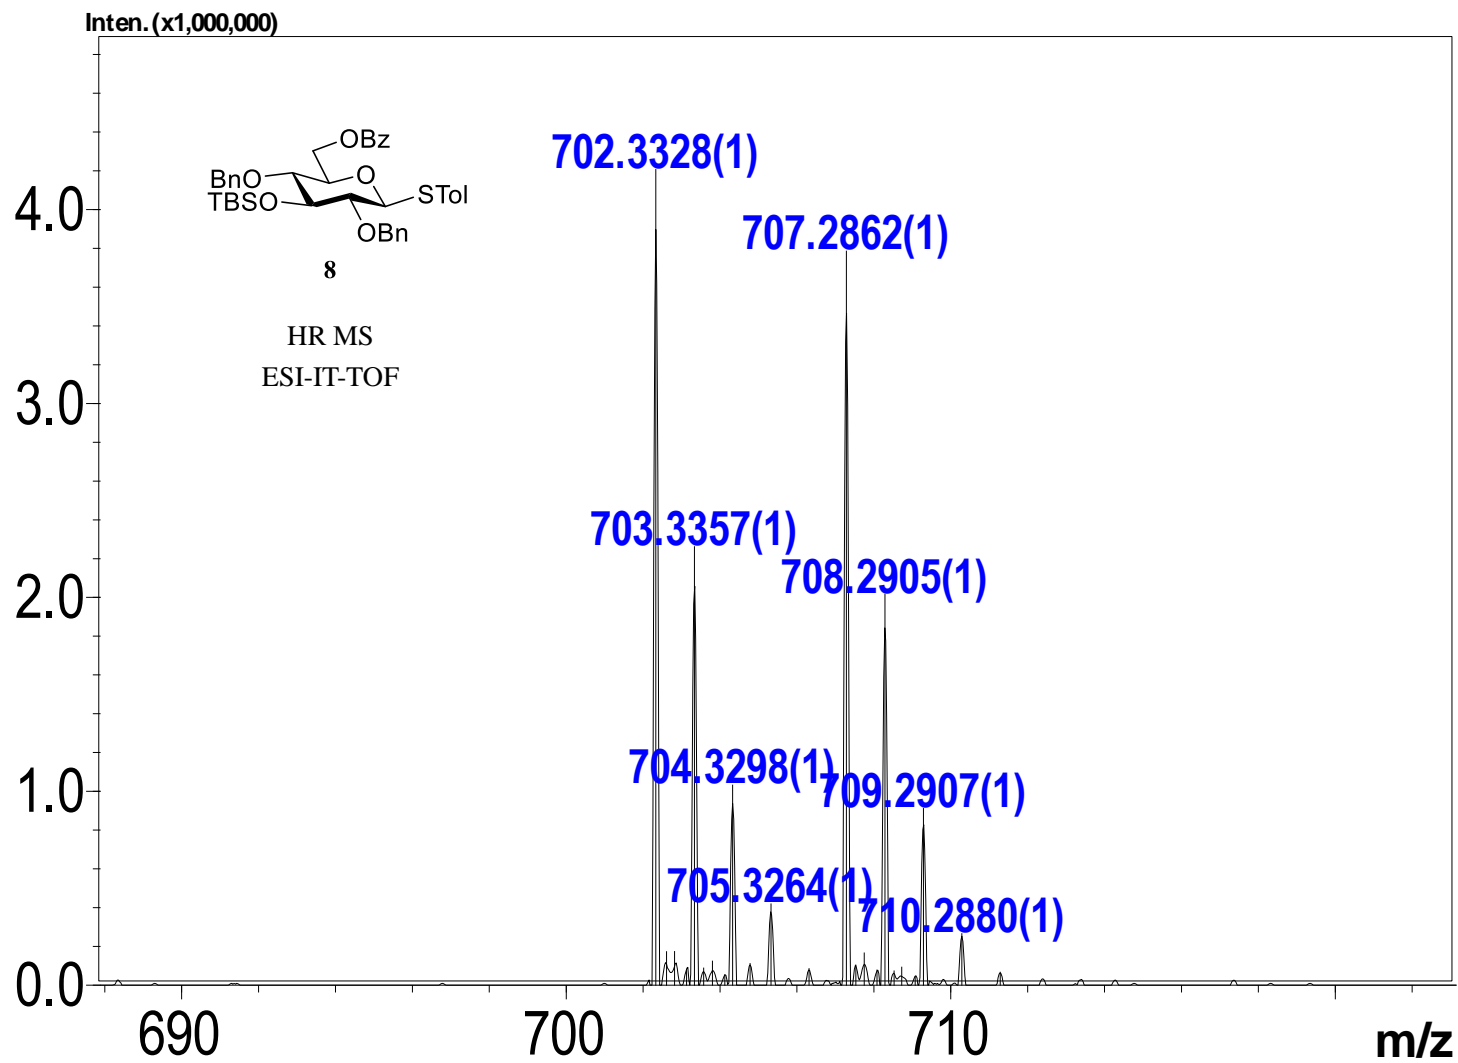

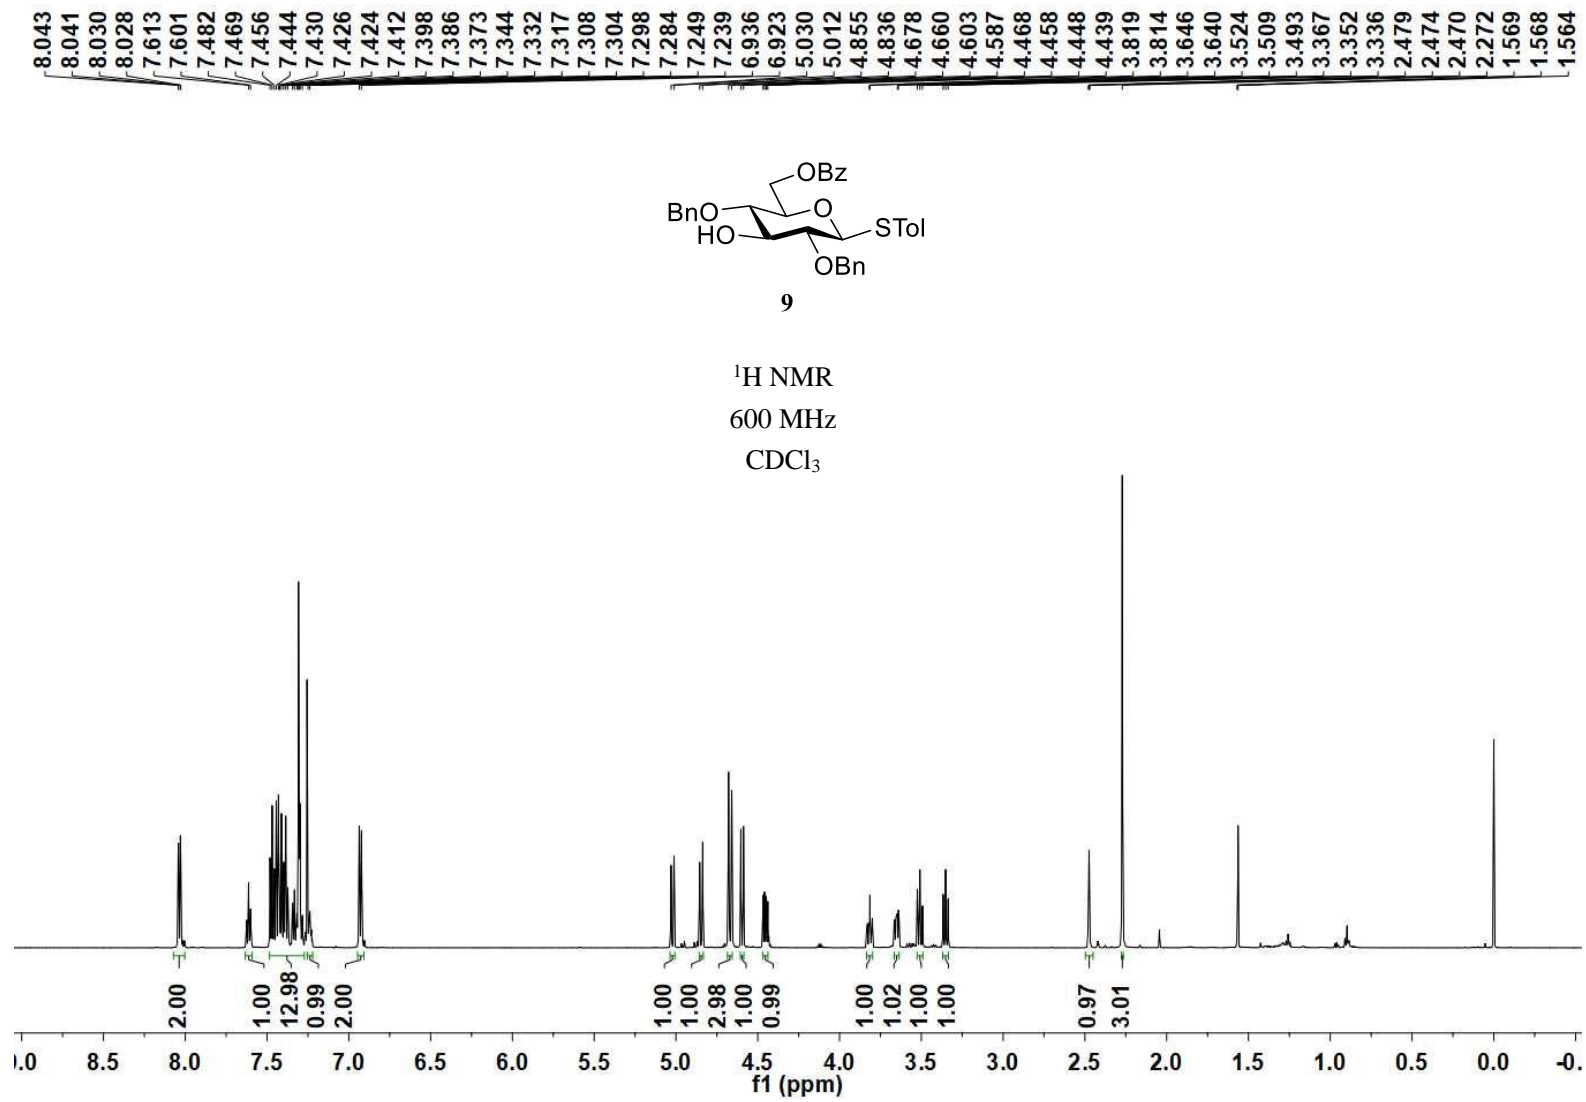



166.12  
138.01  
137.86  
137.73  
133.06  
132.82  
129.96  
129.78  
129.60  
129.20  
128.66  
128.53  
128.34  
128.18  
128.14  
128.11  
128.01

87.09  
80.57  
78.75  
77.14  
76.77  
75.20  
74.77  
63.77

21.11

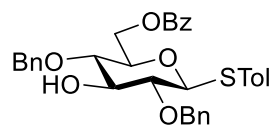

9

<sup>13</sup>C NMR  
150 MHz  
CDCl<sub>3</sub>

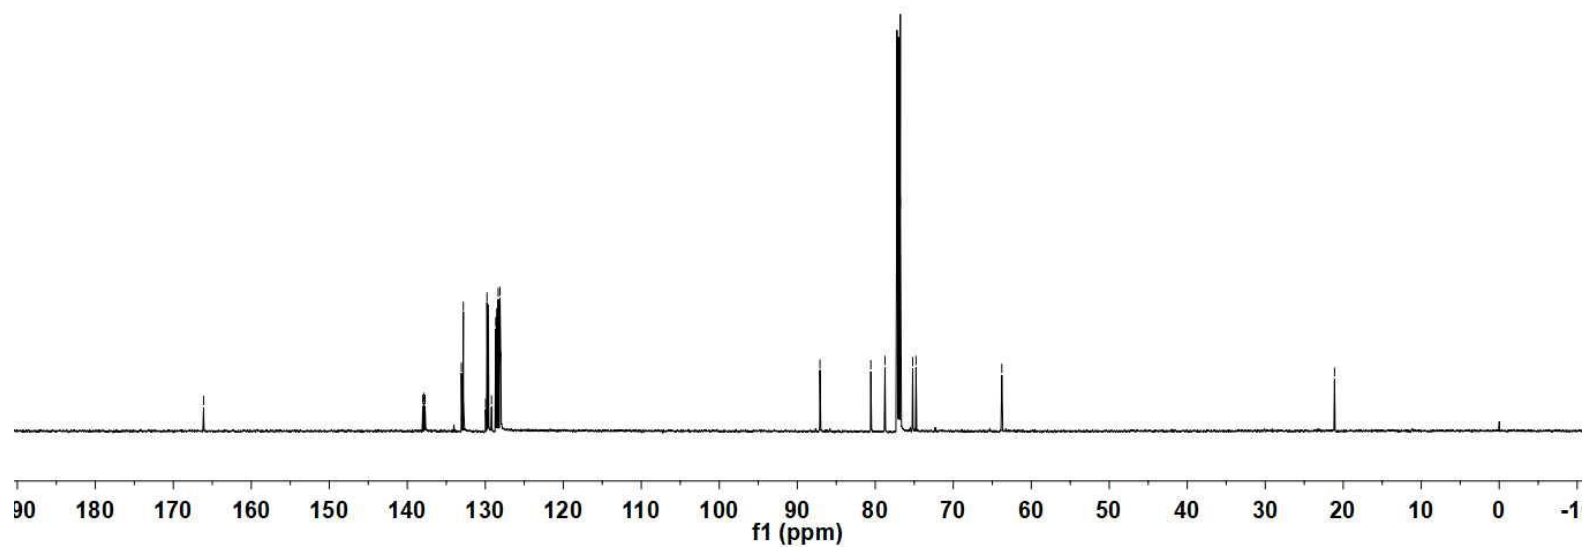

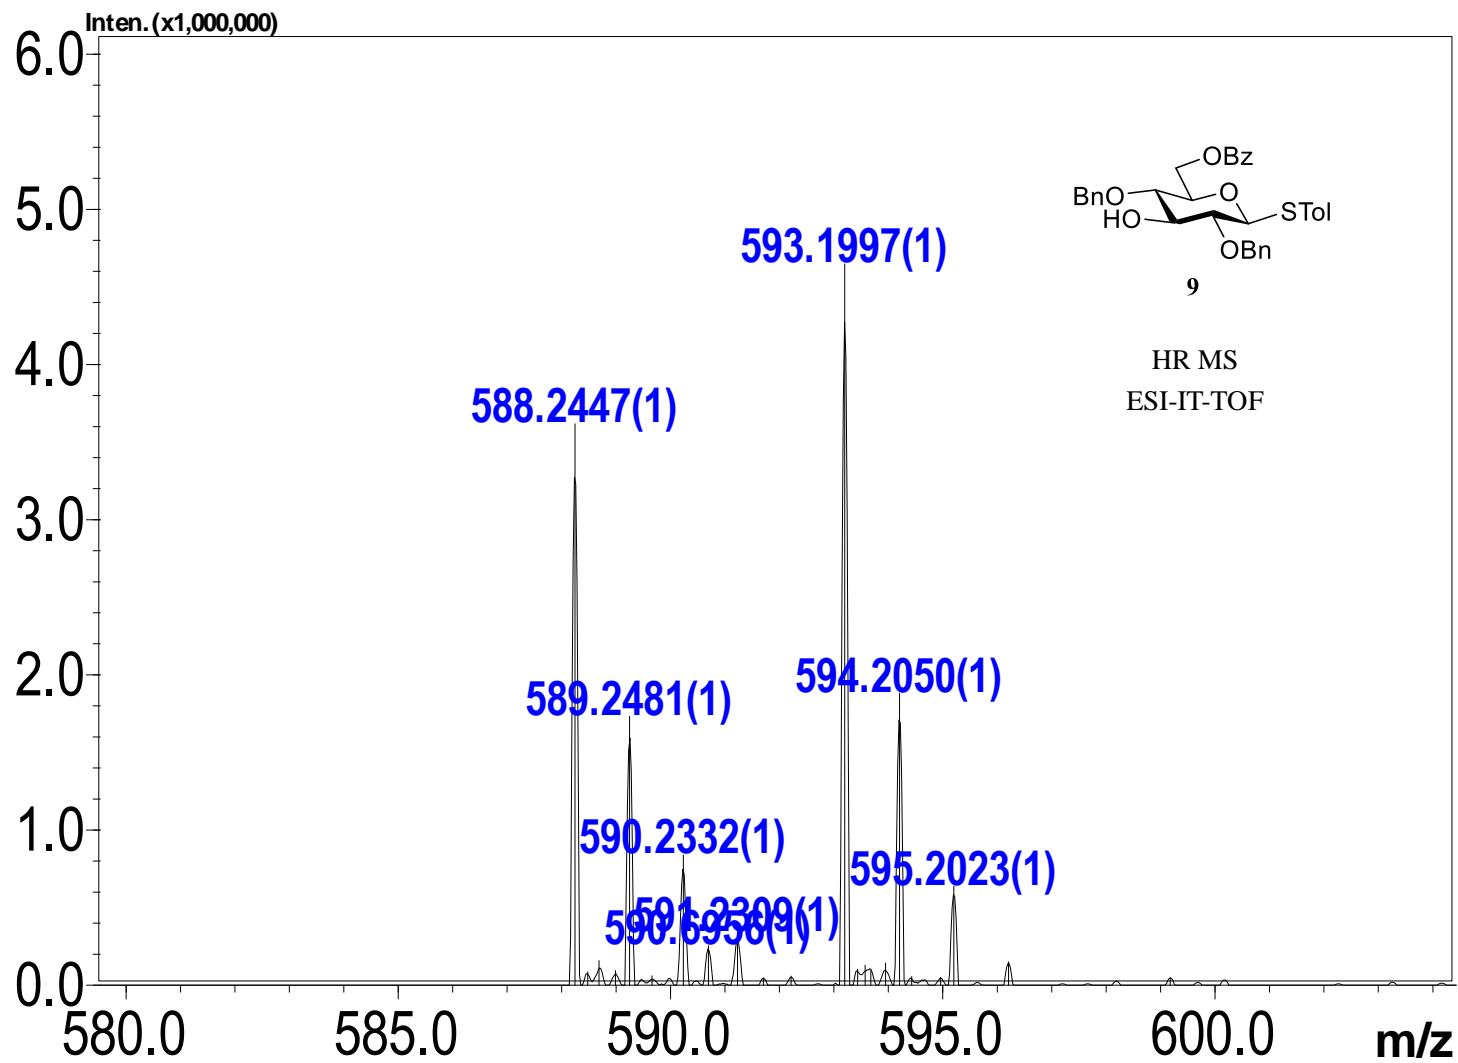

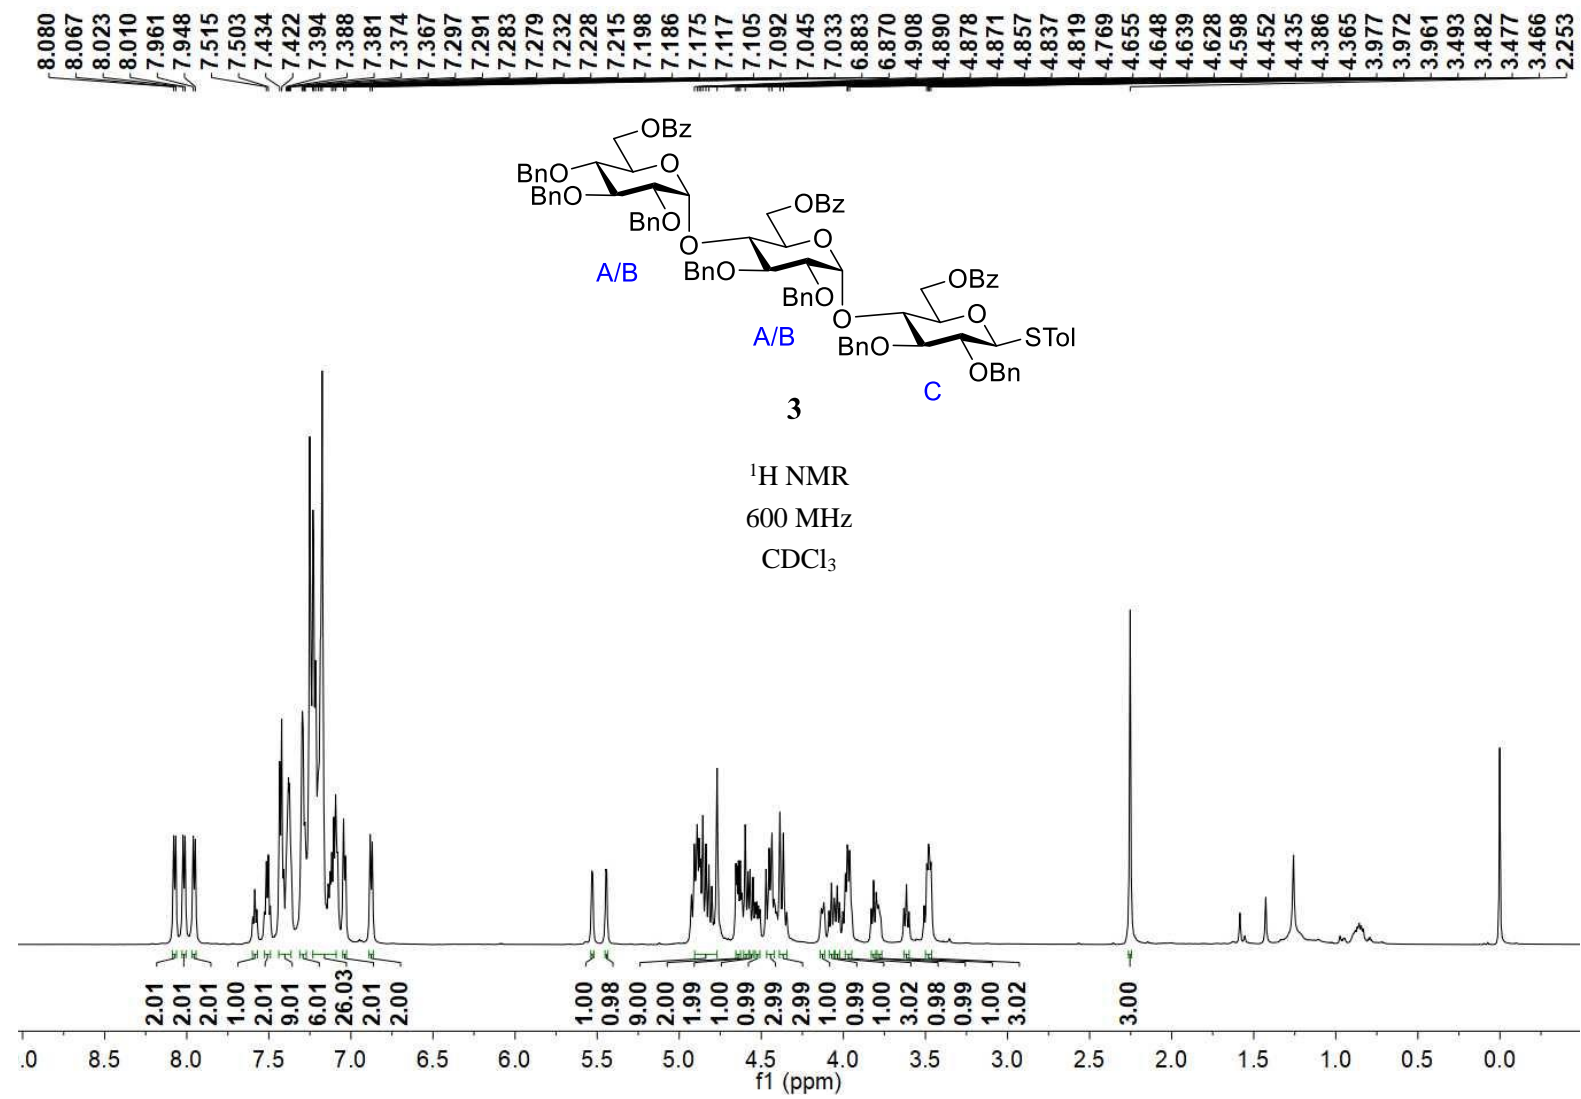

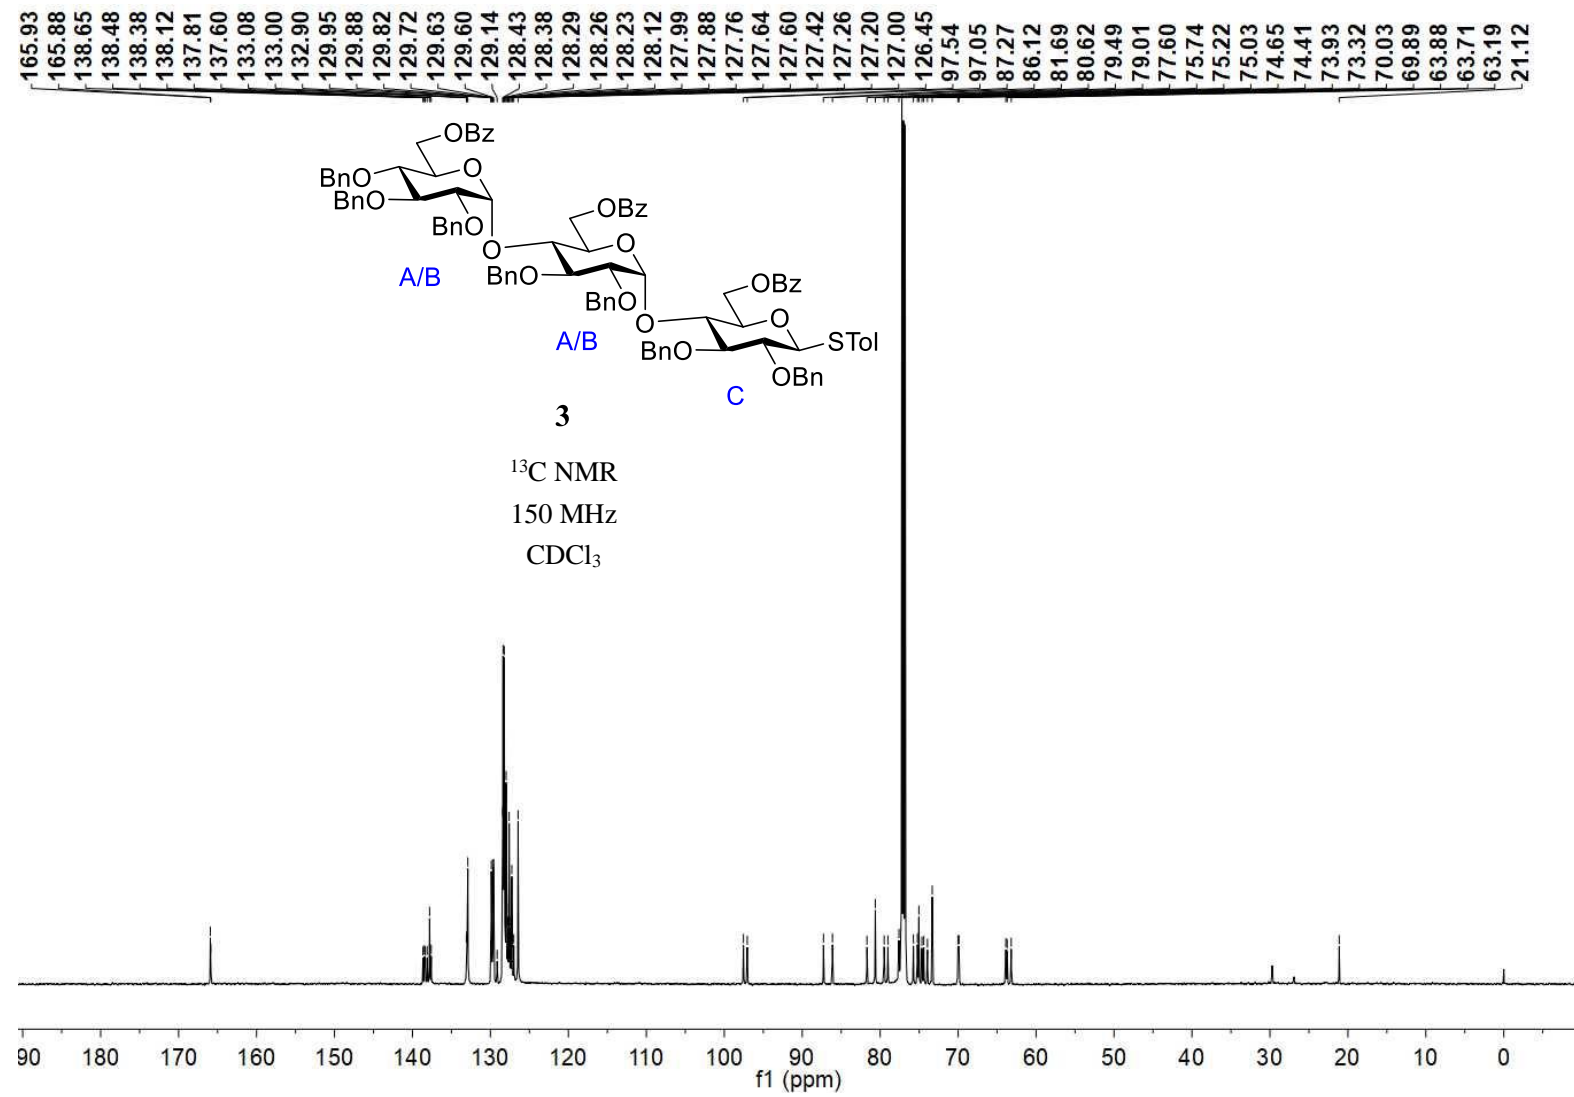

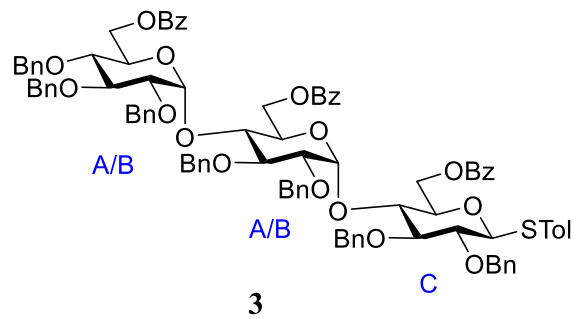

<sup>1</sup>H-<sup>1</sup>H COSY  
600 MHz  
CDCl<sub>3</sub>

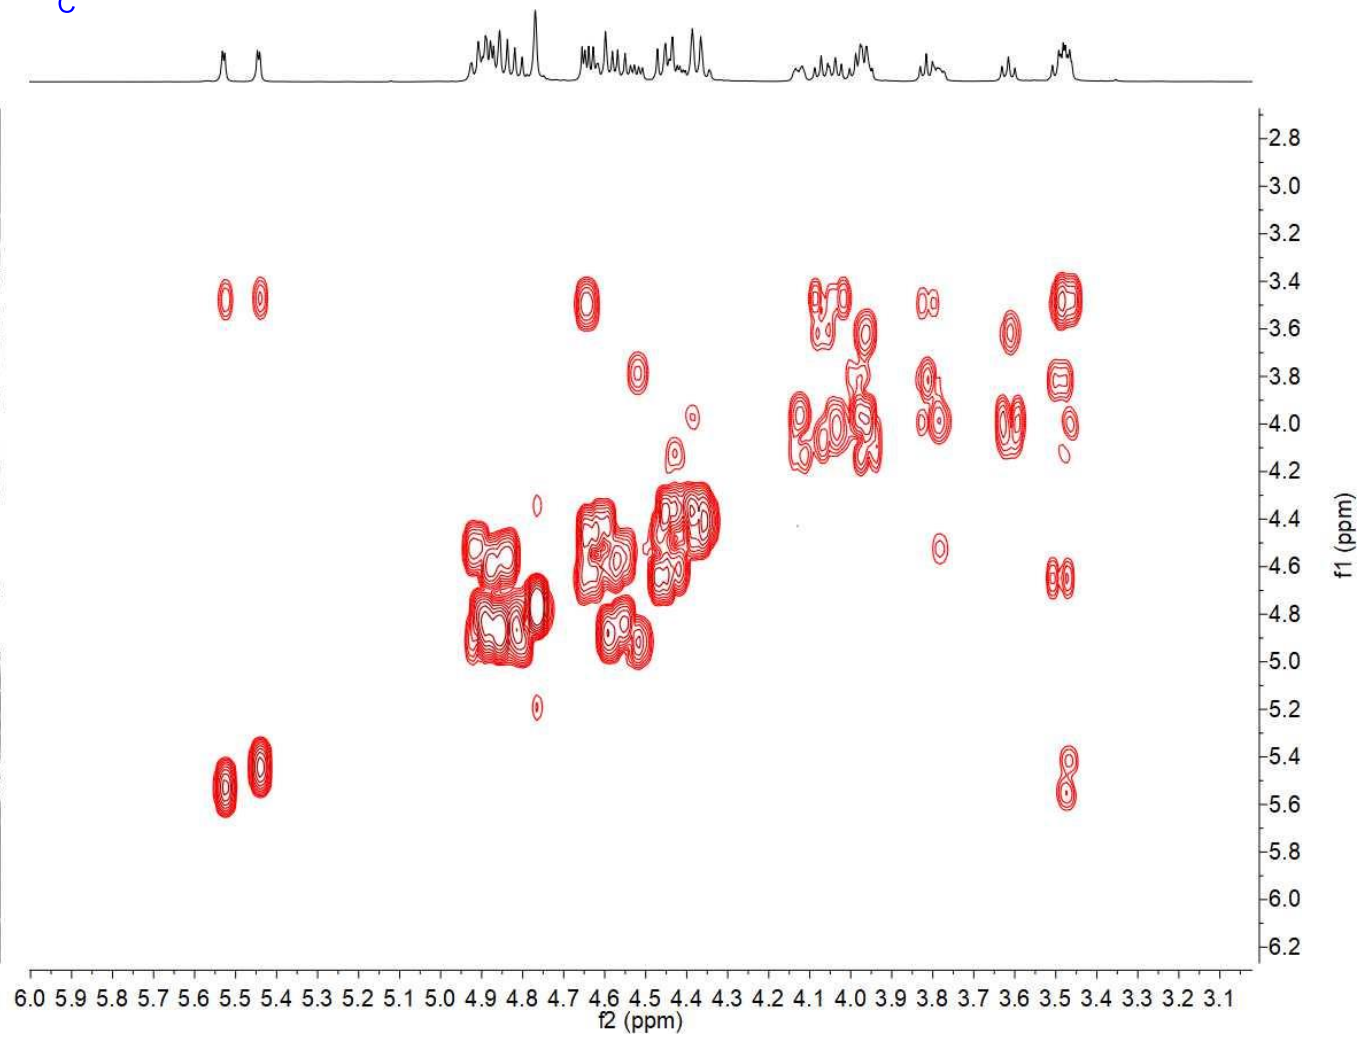

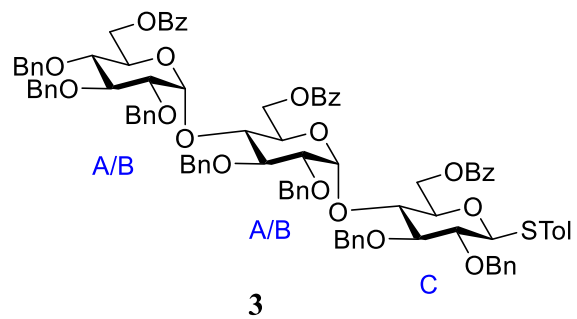

$^1\text{H}$ - $^{13}\text{C}$  HSQC  
600/150 MHz  
 $\text{CDCl}_3$

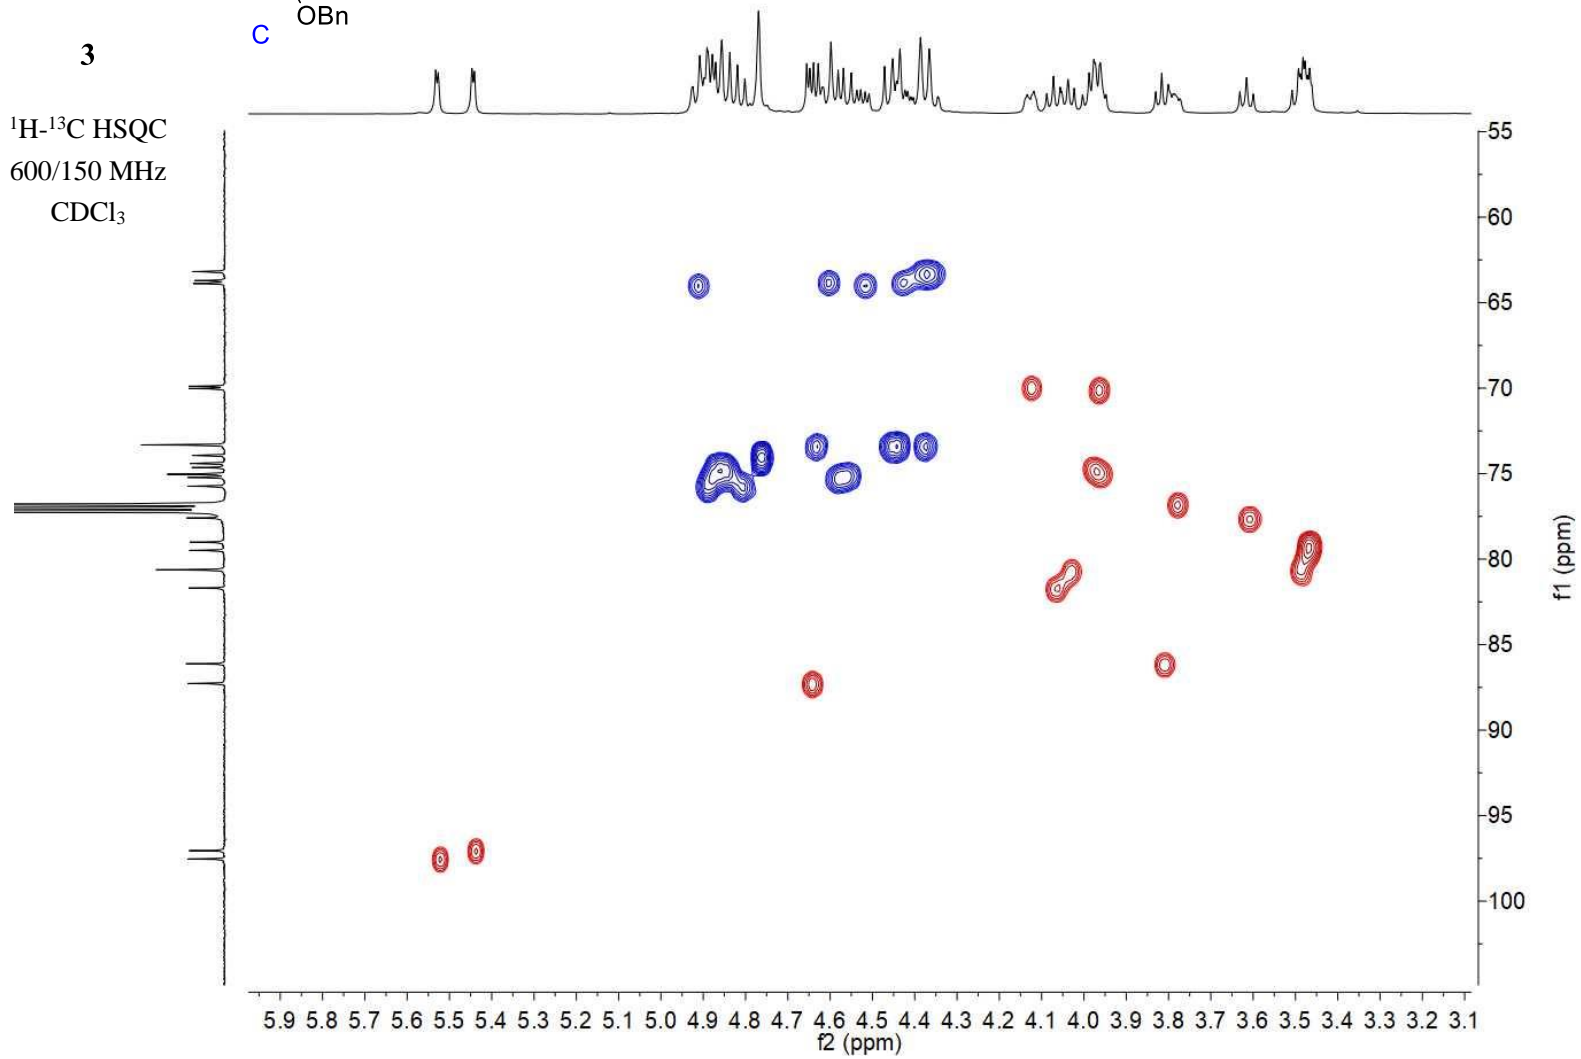

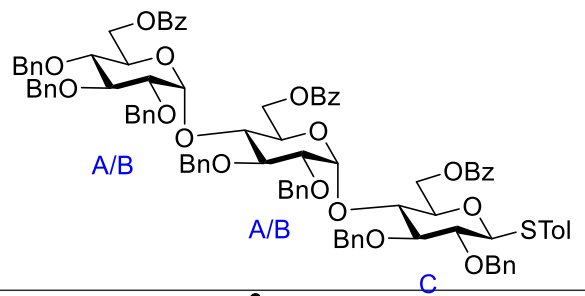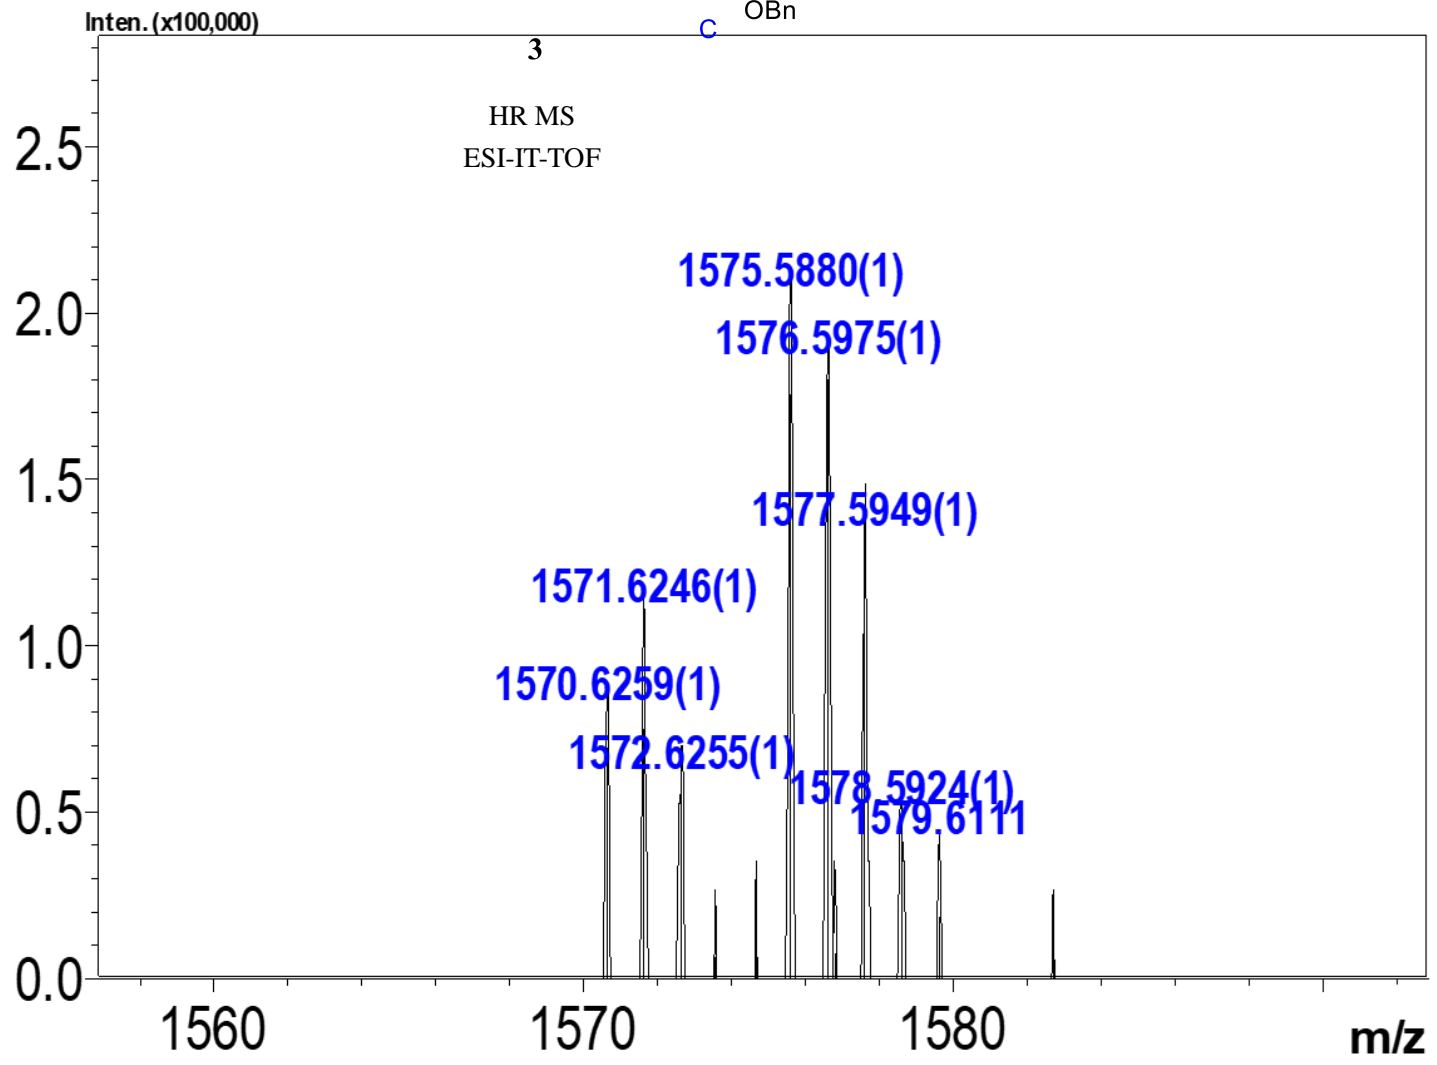

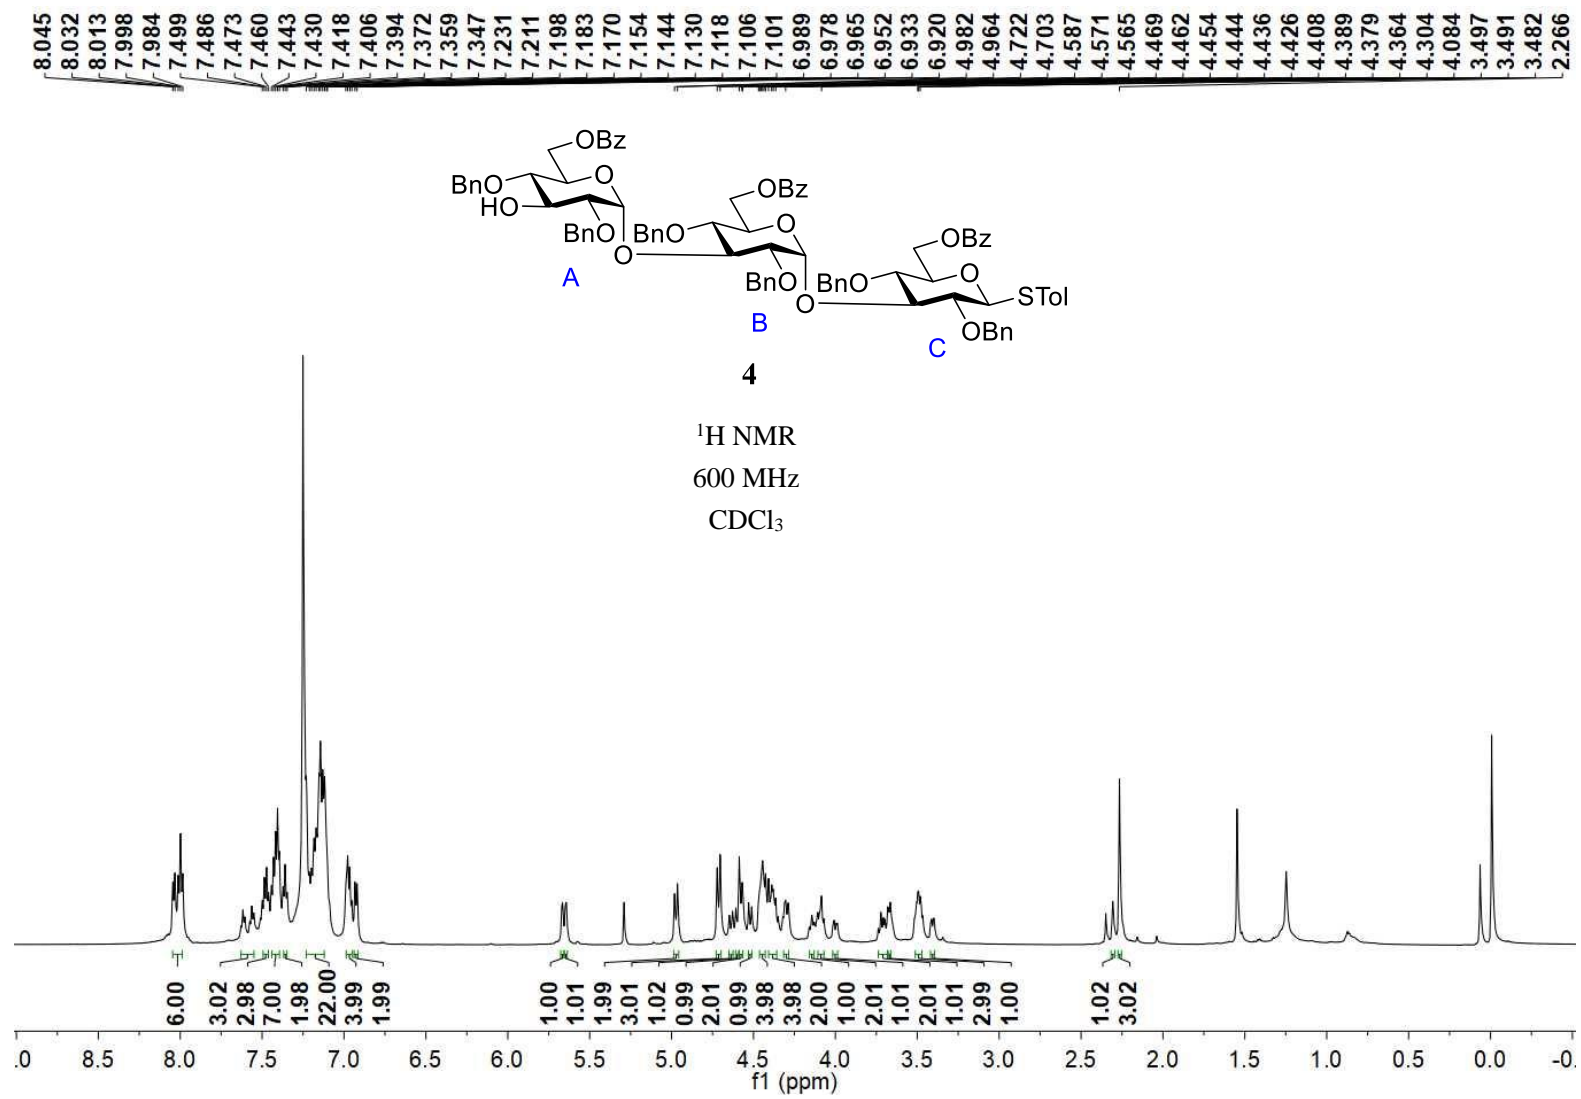



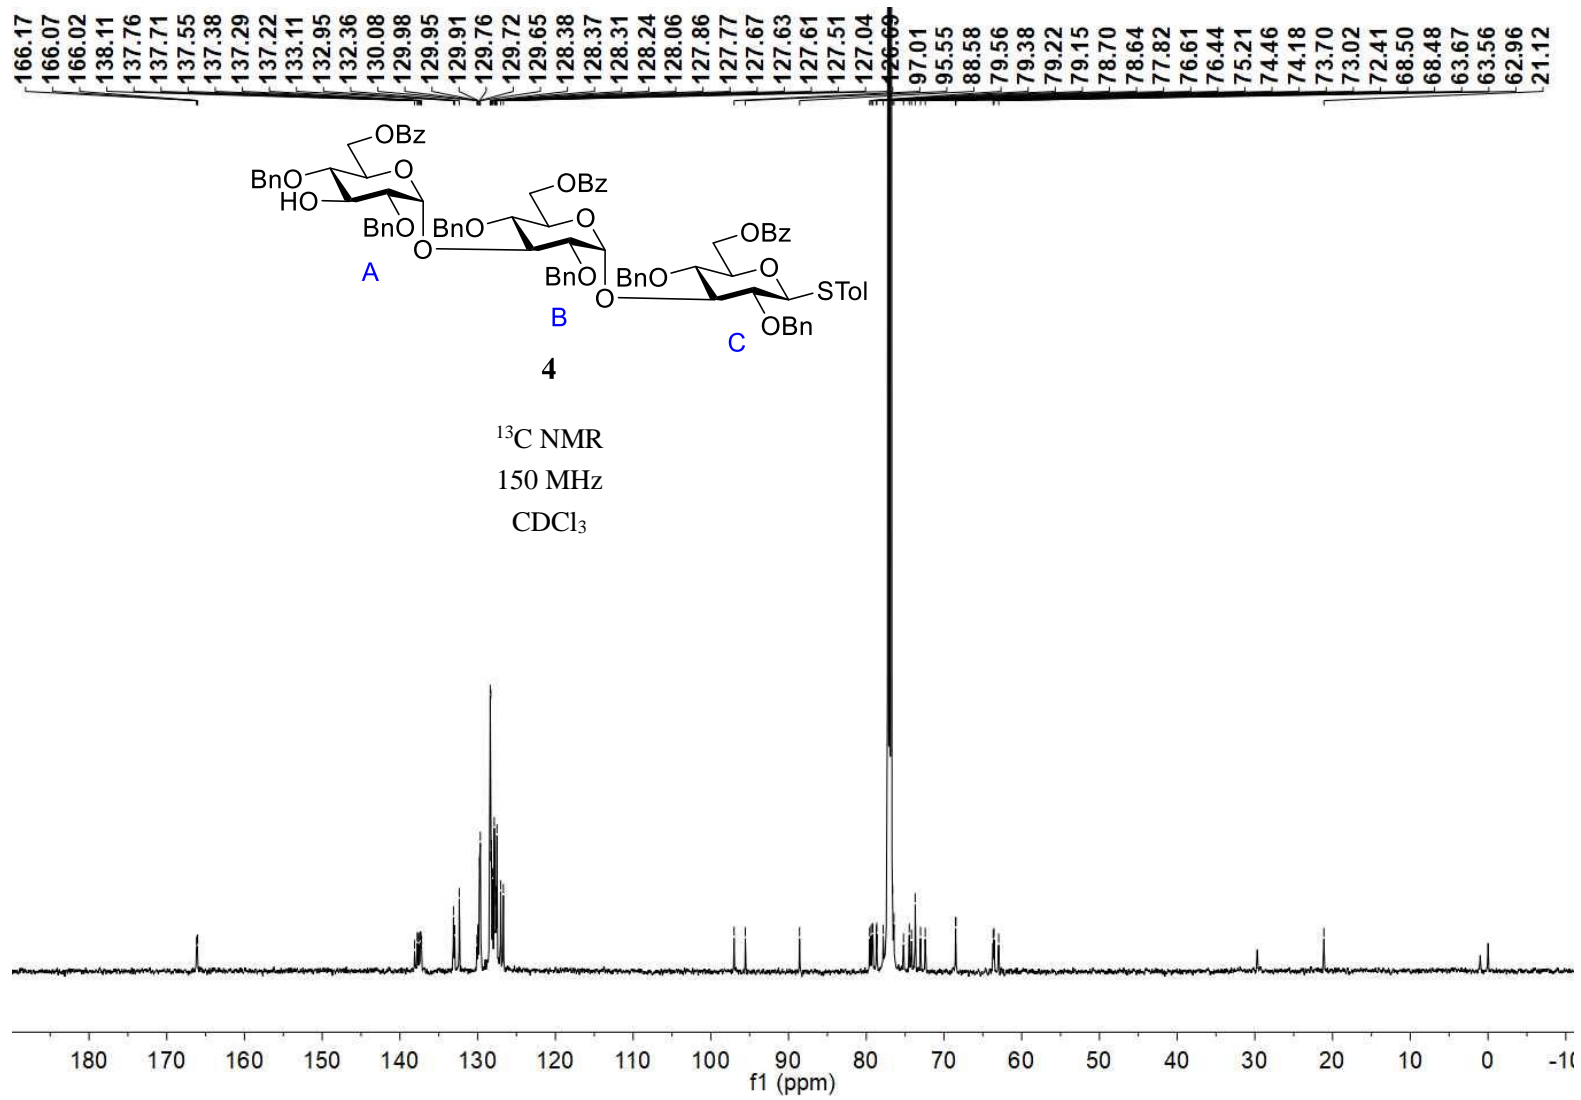

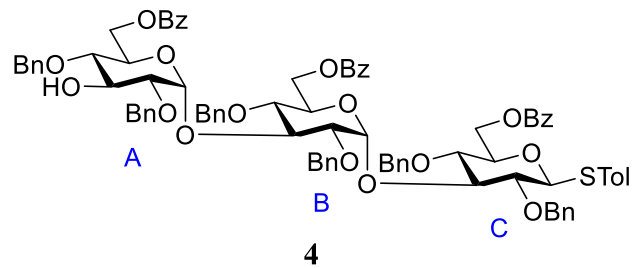

$^1\text{H}$ - $^1\text{H}$  COSY  
600 MHz  
 $\text{CDCl}_3$

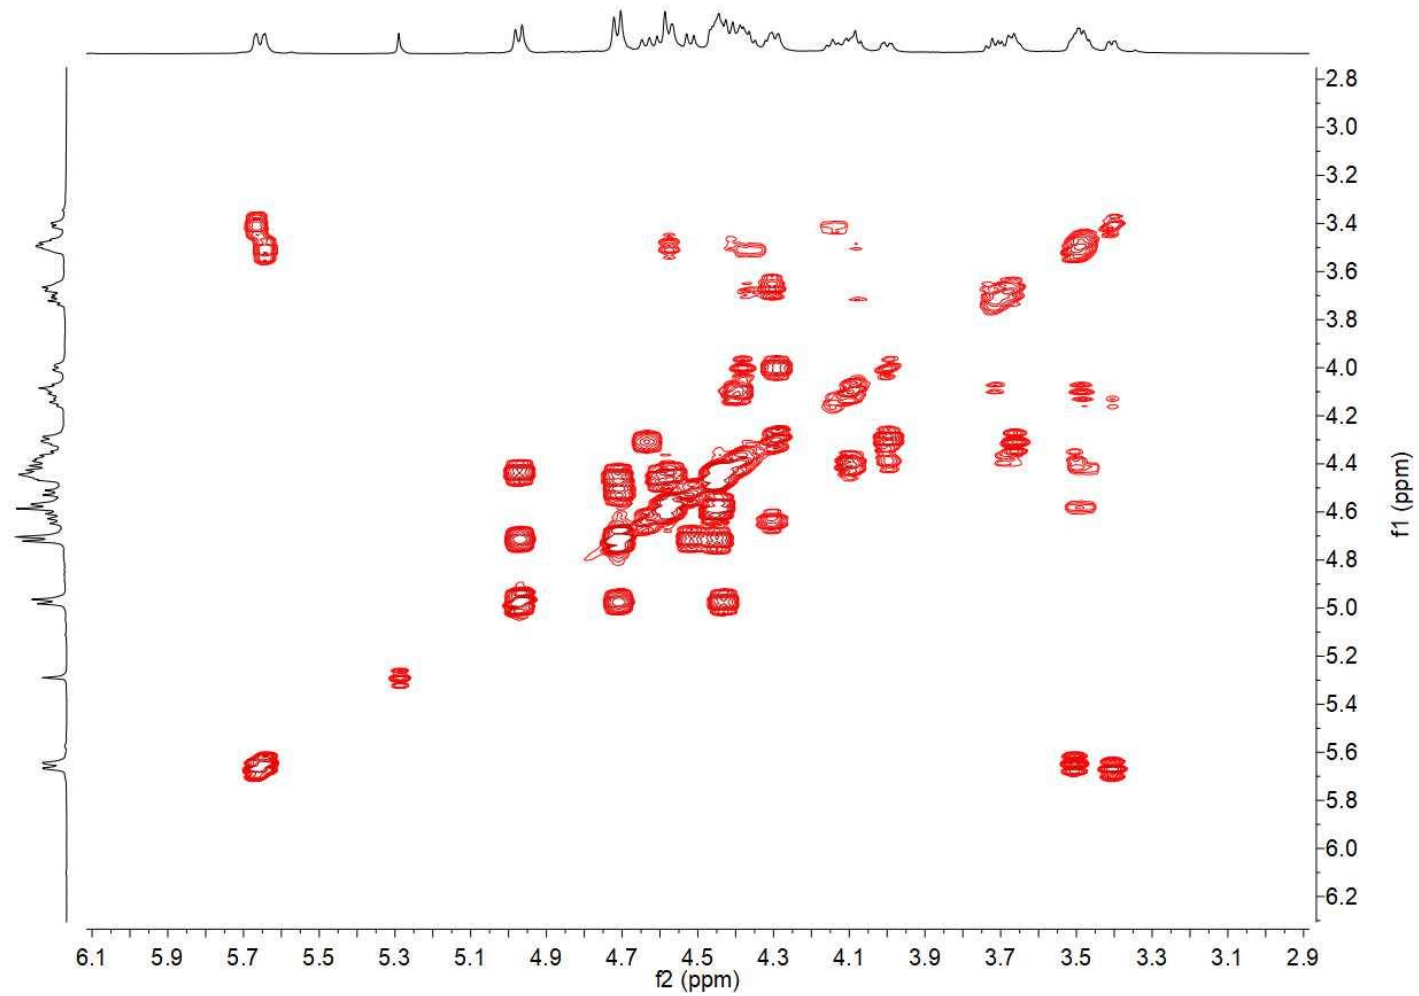

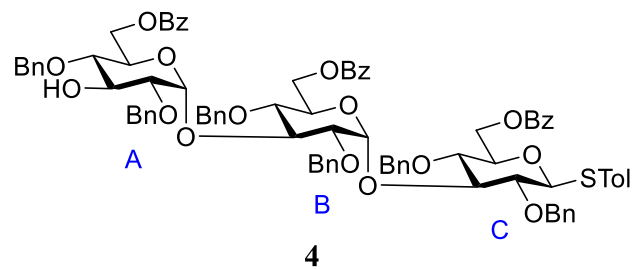

$^1\text{H}$ - $^{13}\text{C}$  HSQC  
600/150 MHz  
 $\text{CDCl}_3$

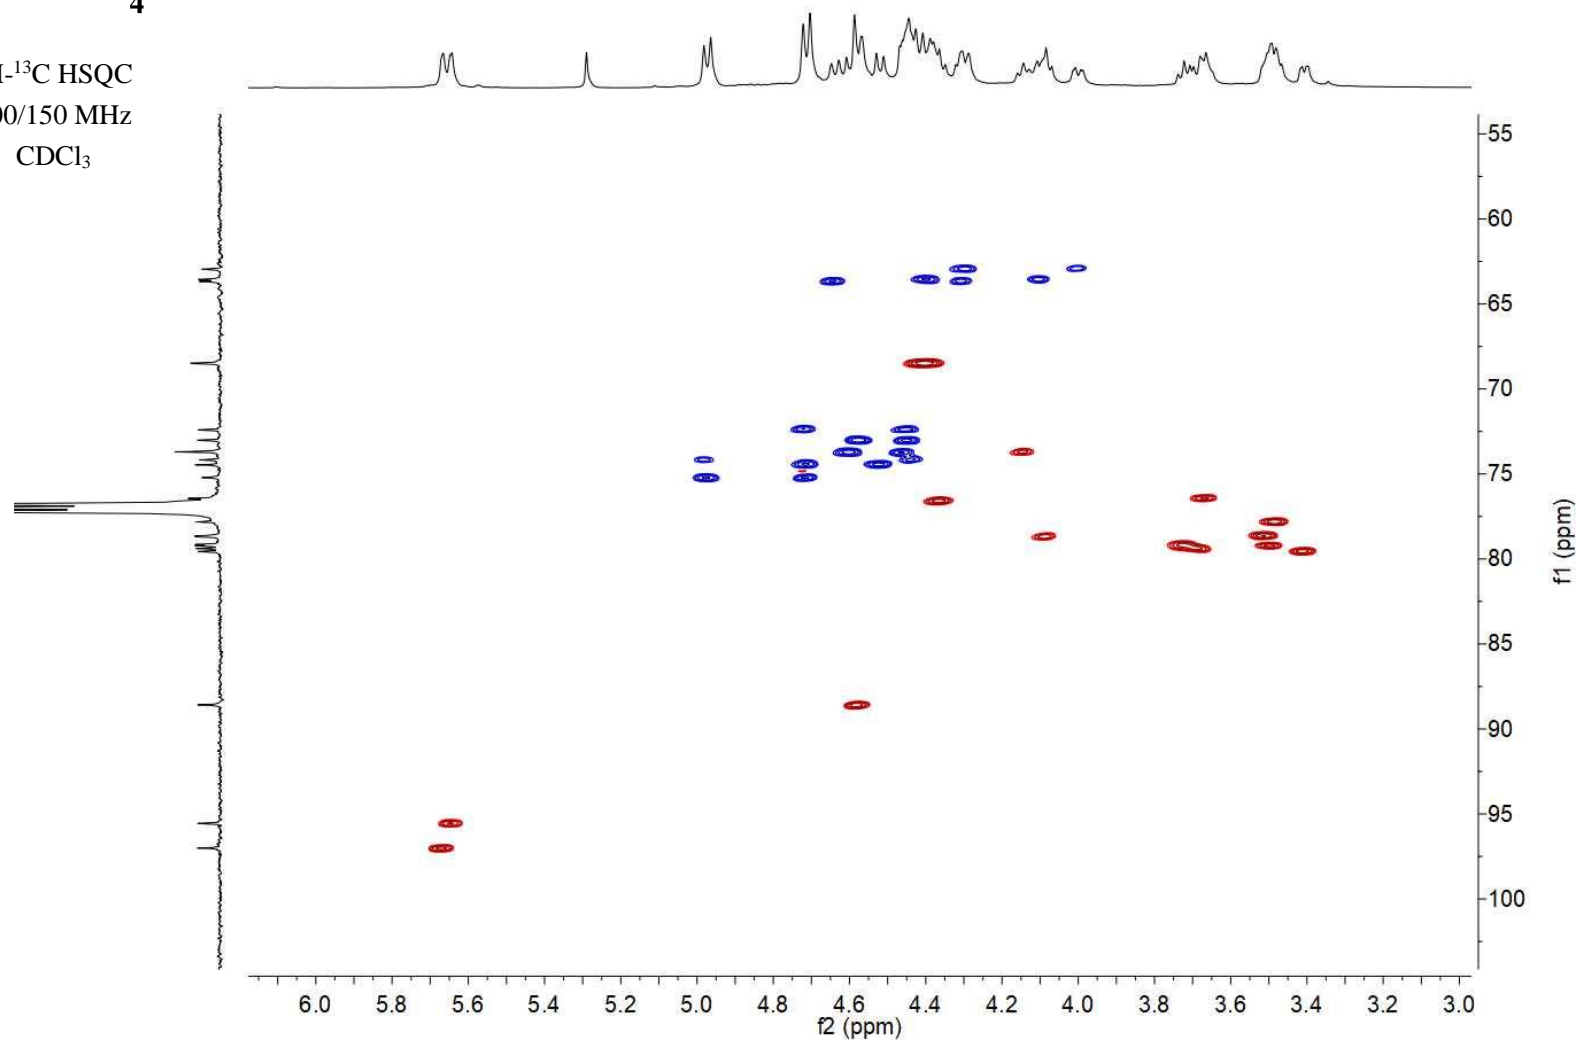

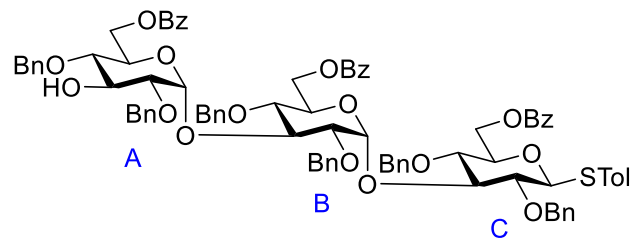

HR MS  
ESI-IT-TOF

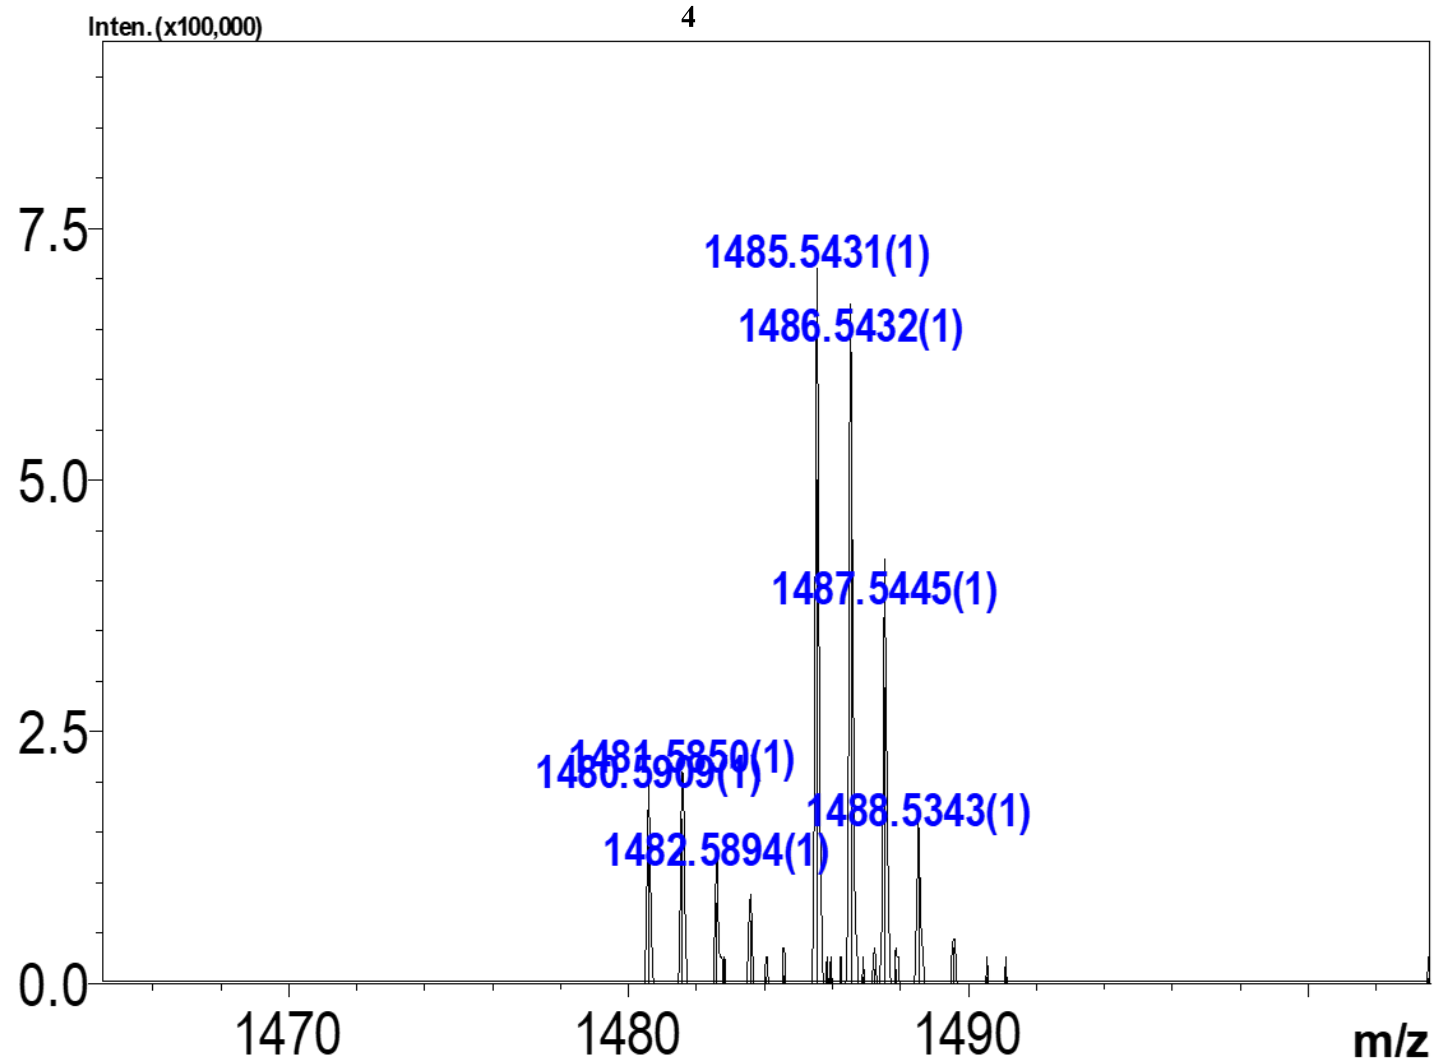

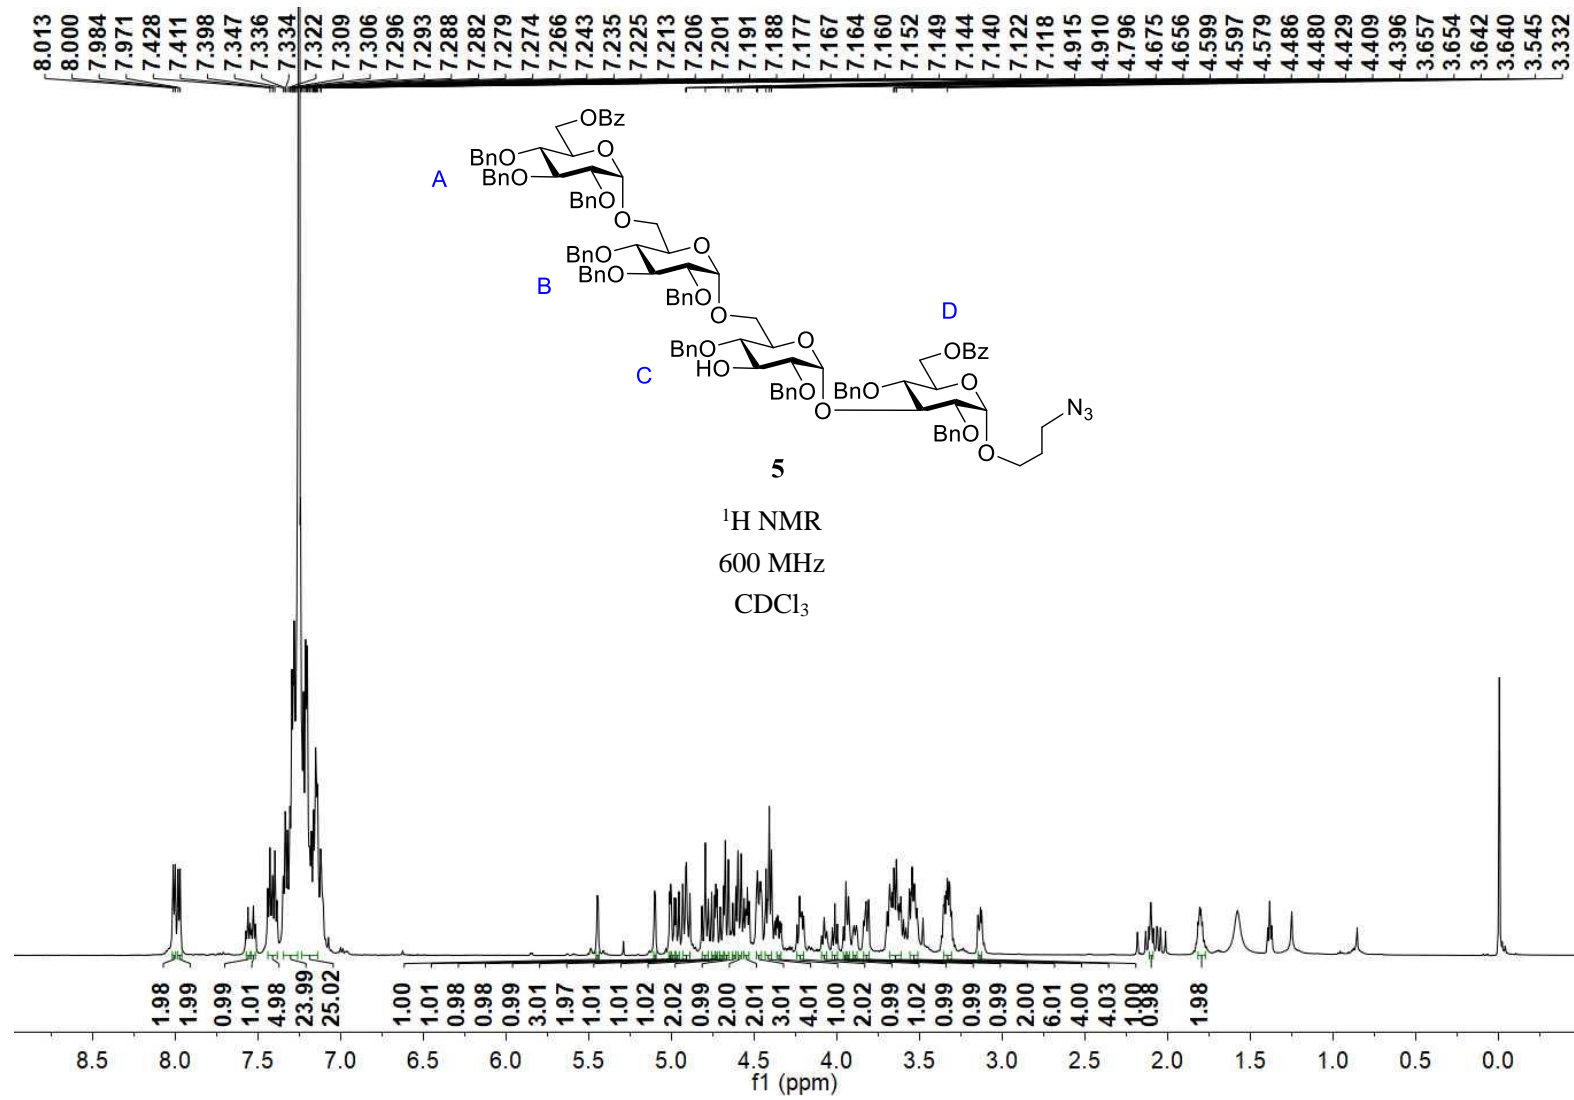

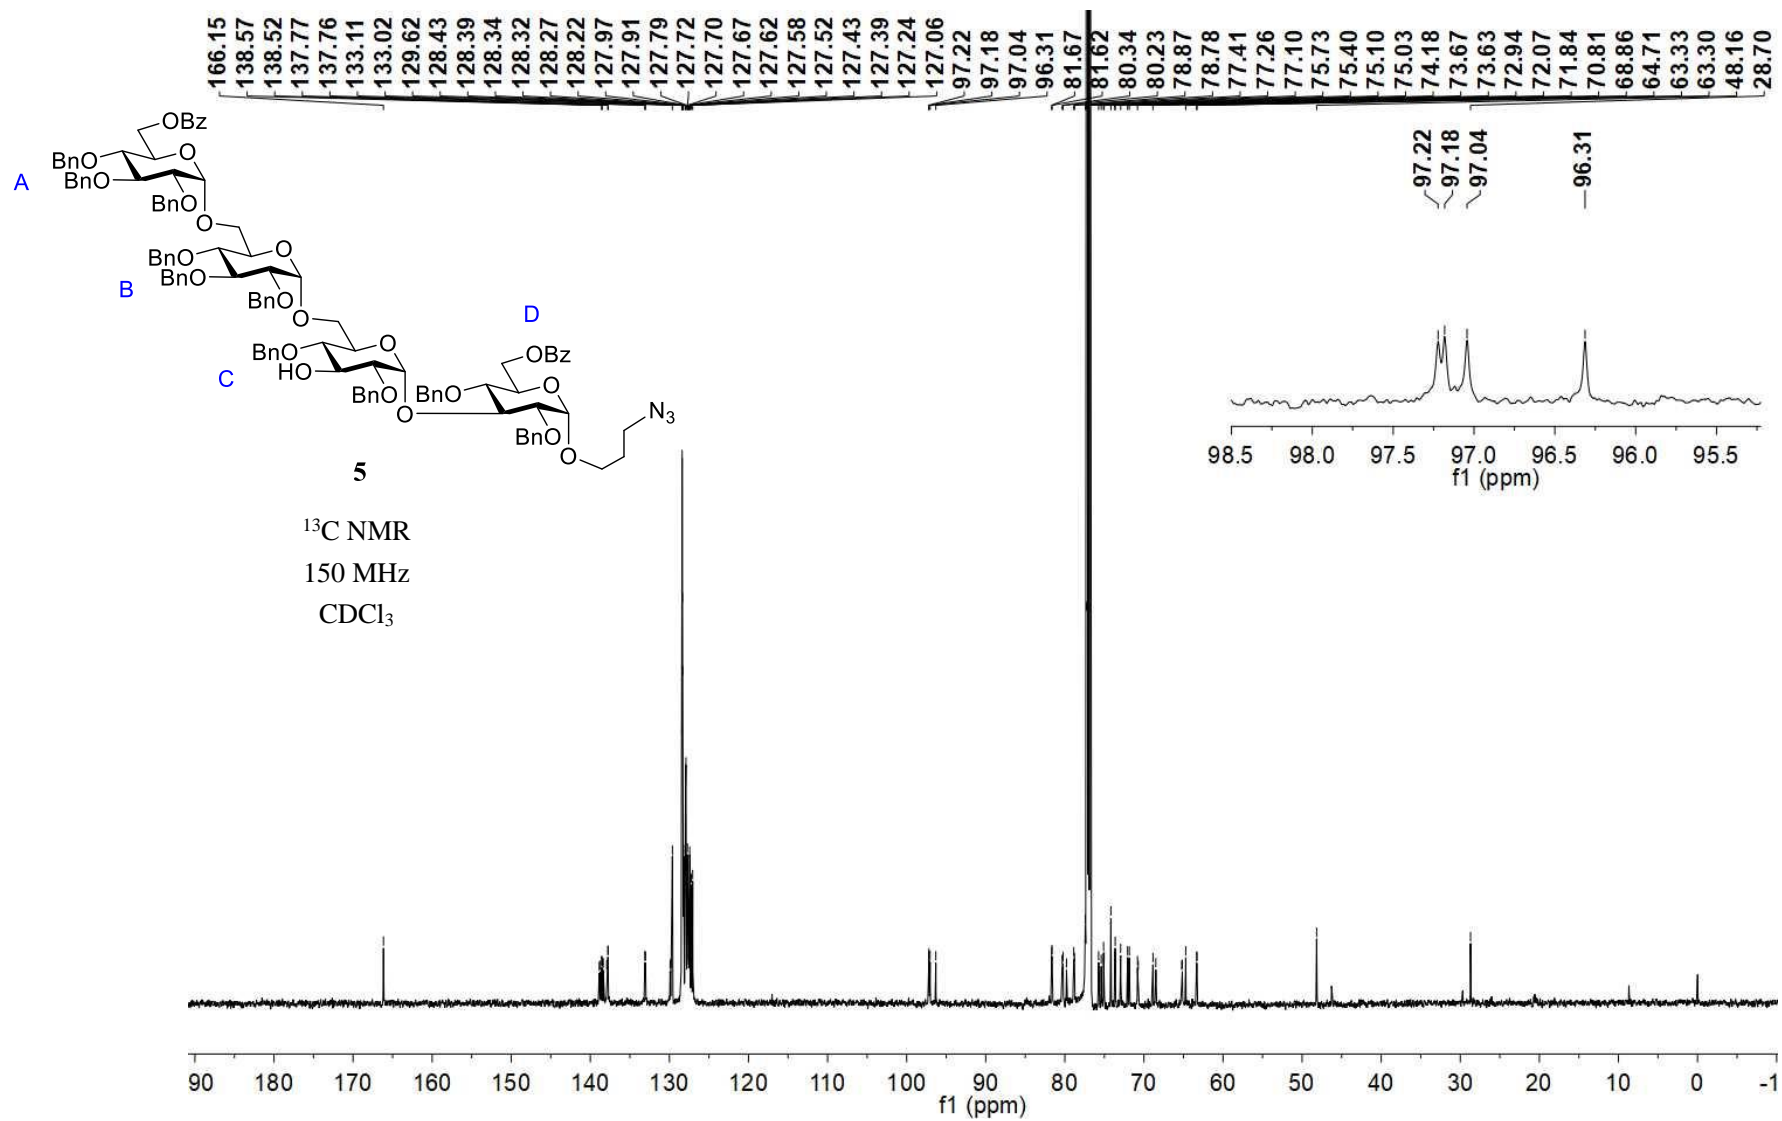

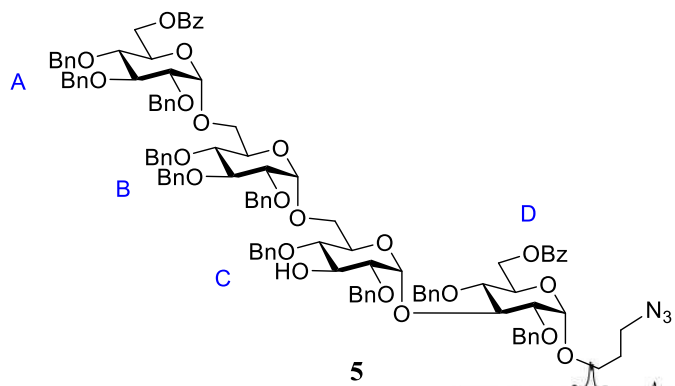

<sup>1</sup>H-<sup>1</sup>H COSY  
600 MHz  
CDCl<sub>3</sub>

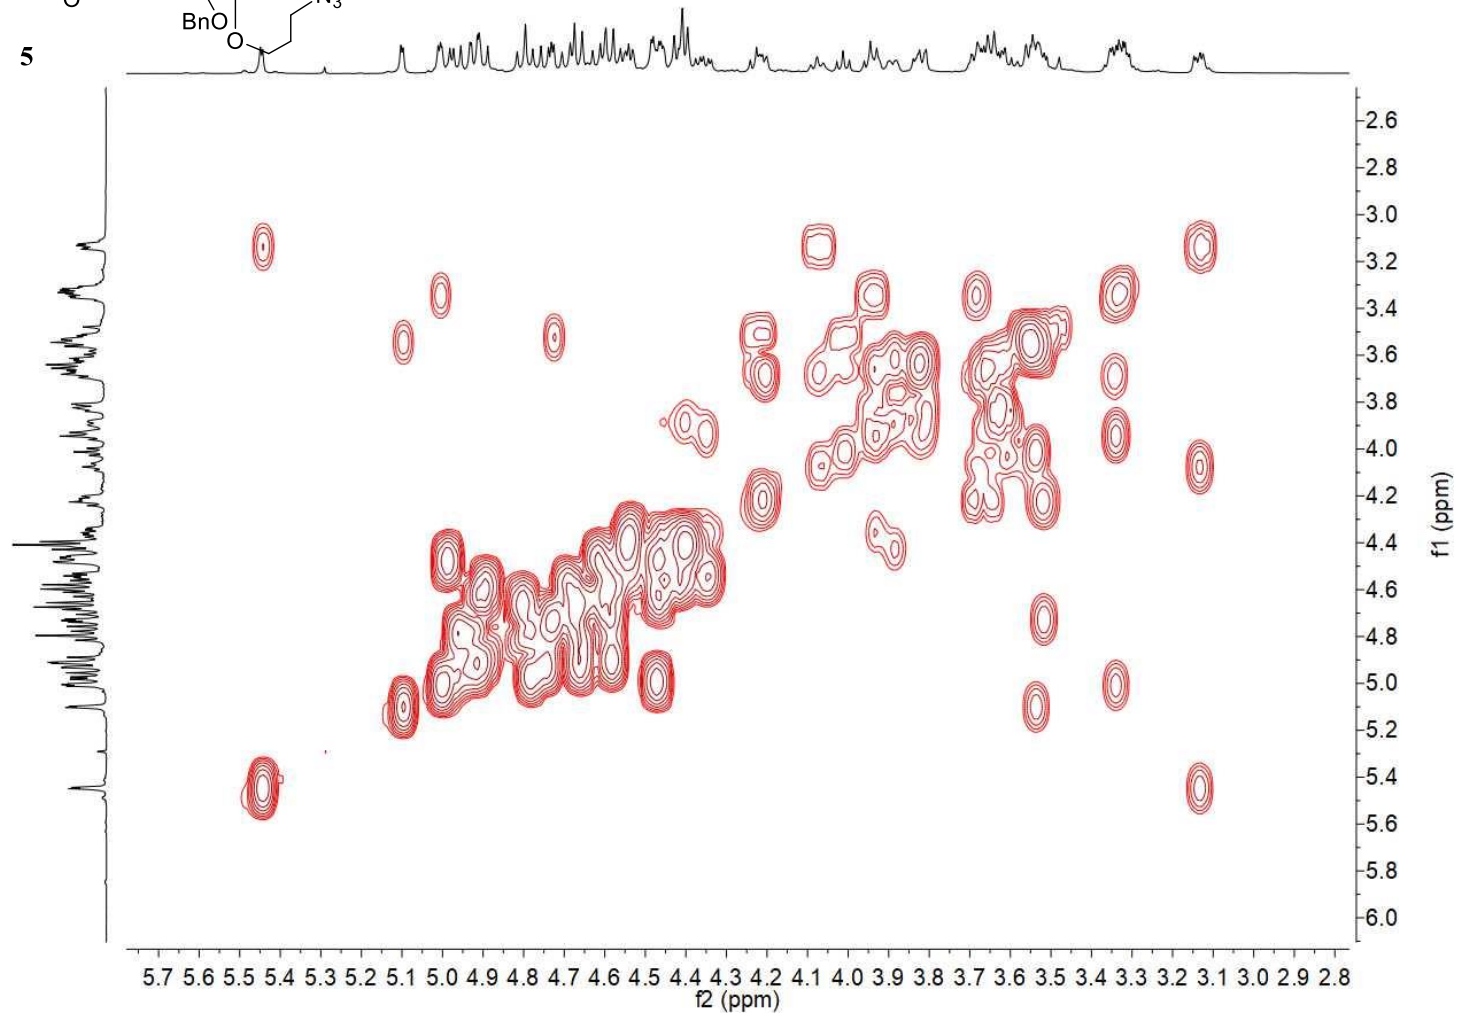

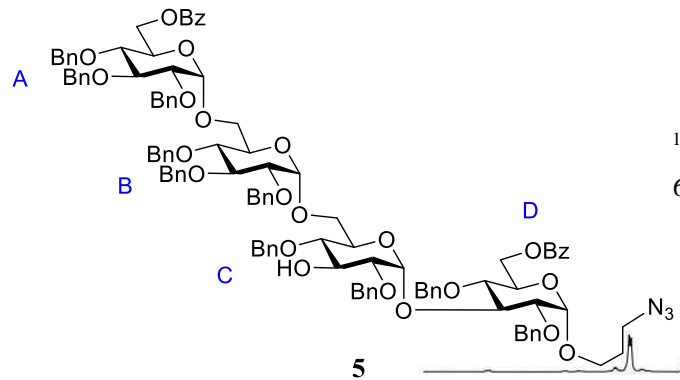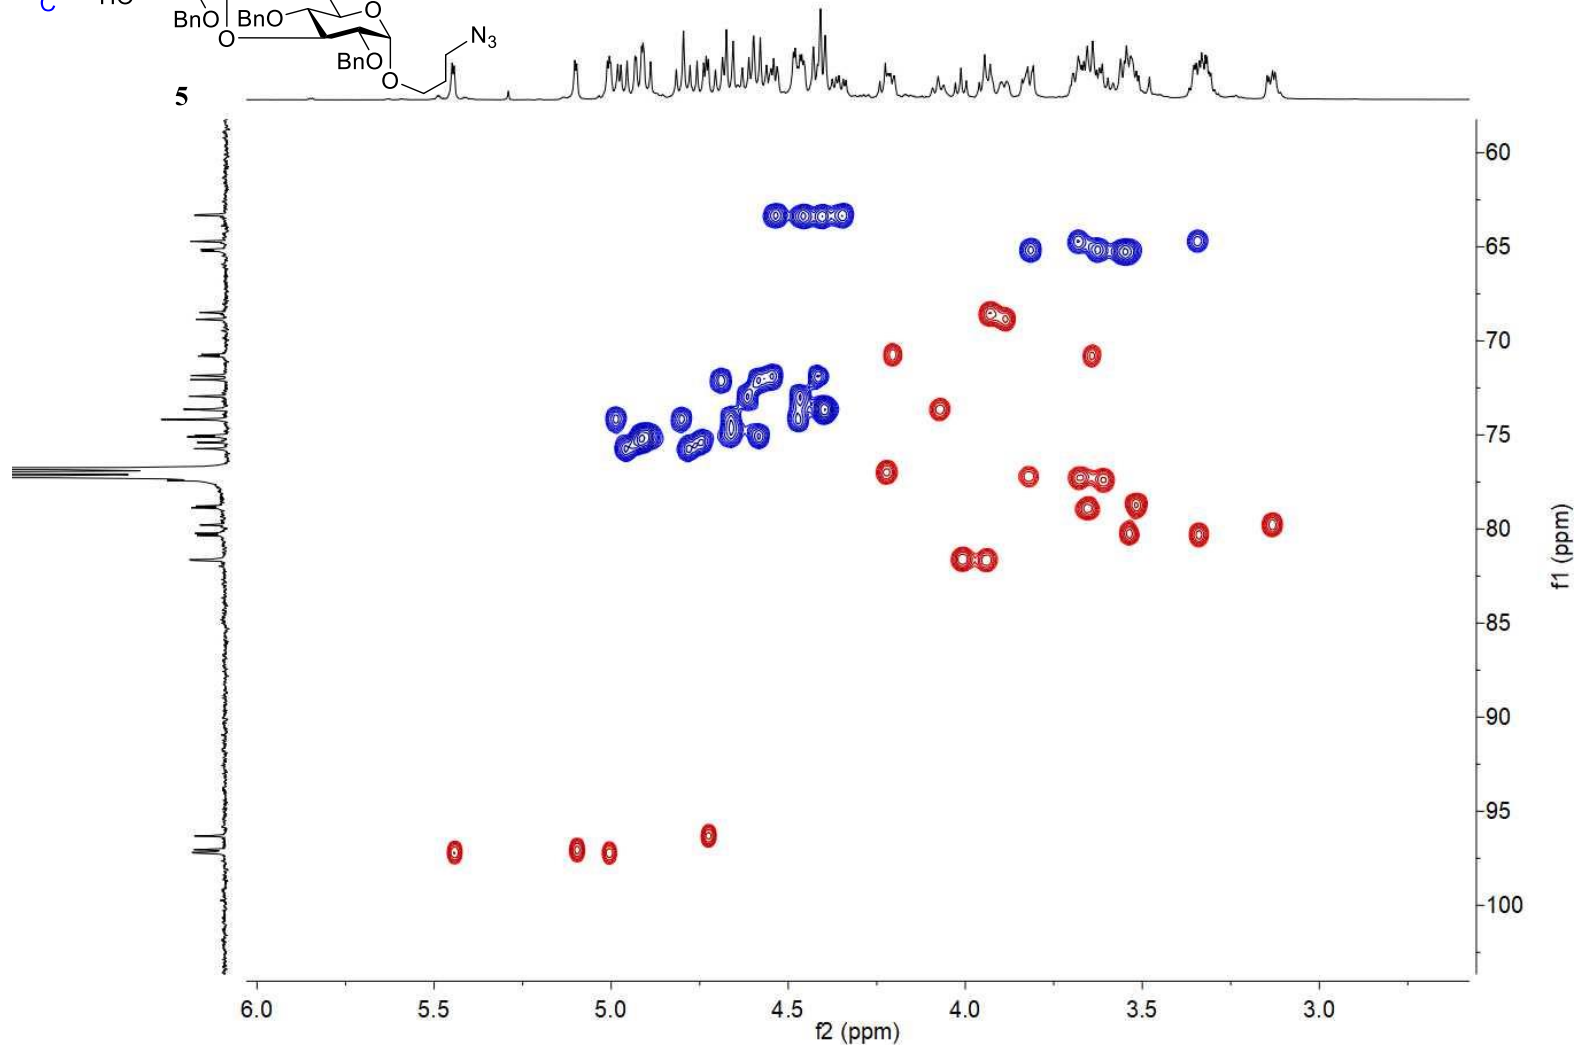



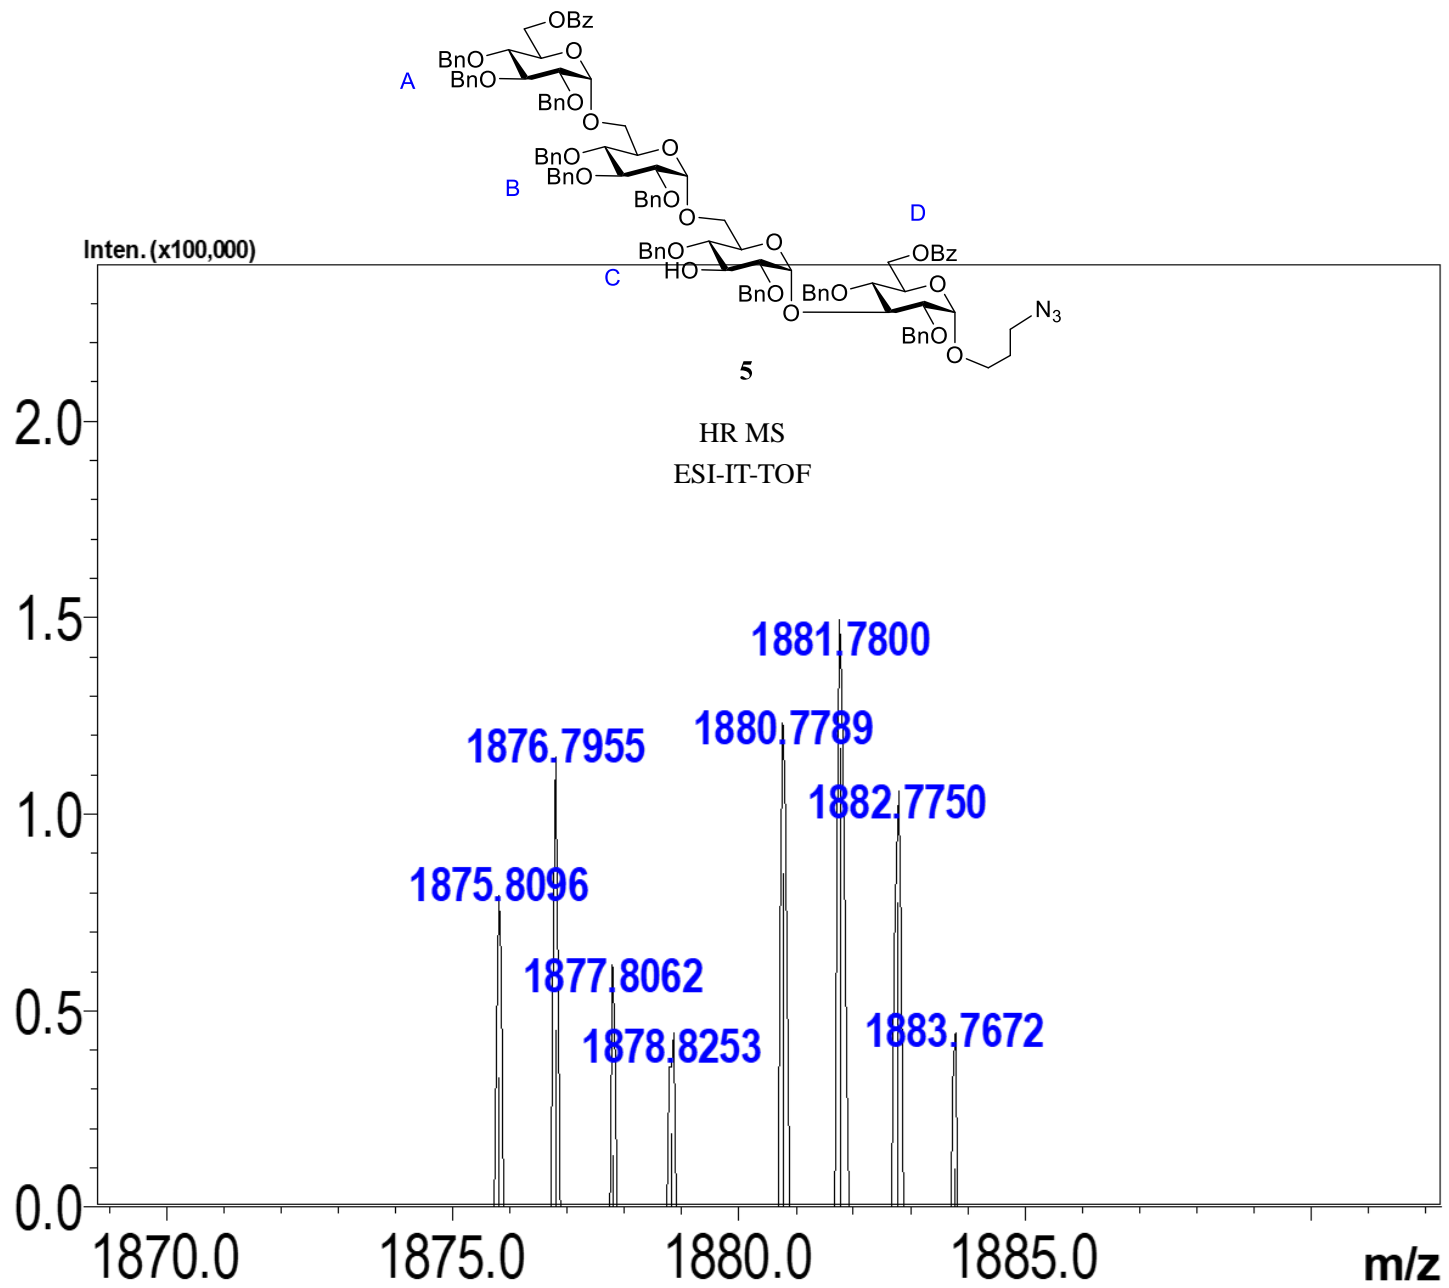

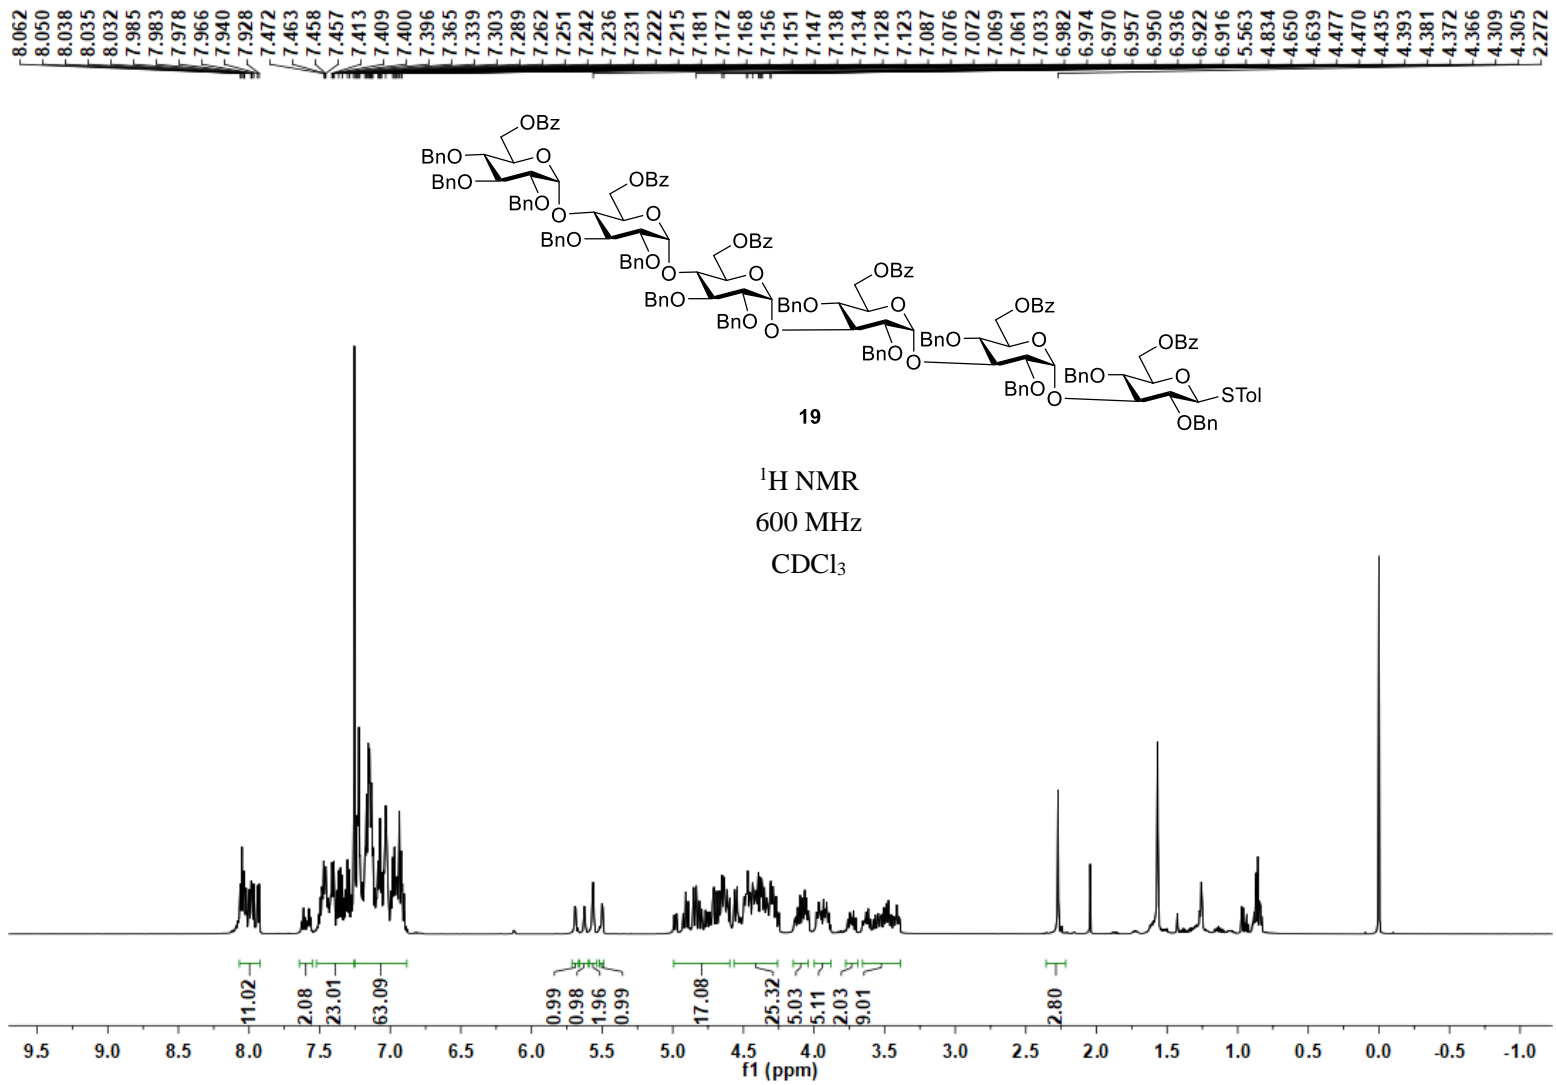

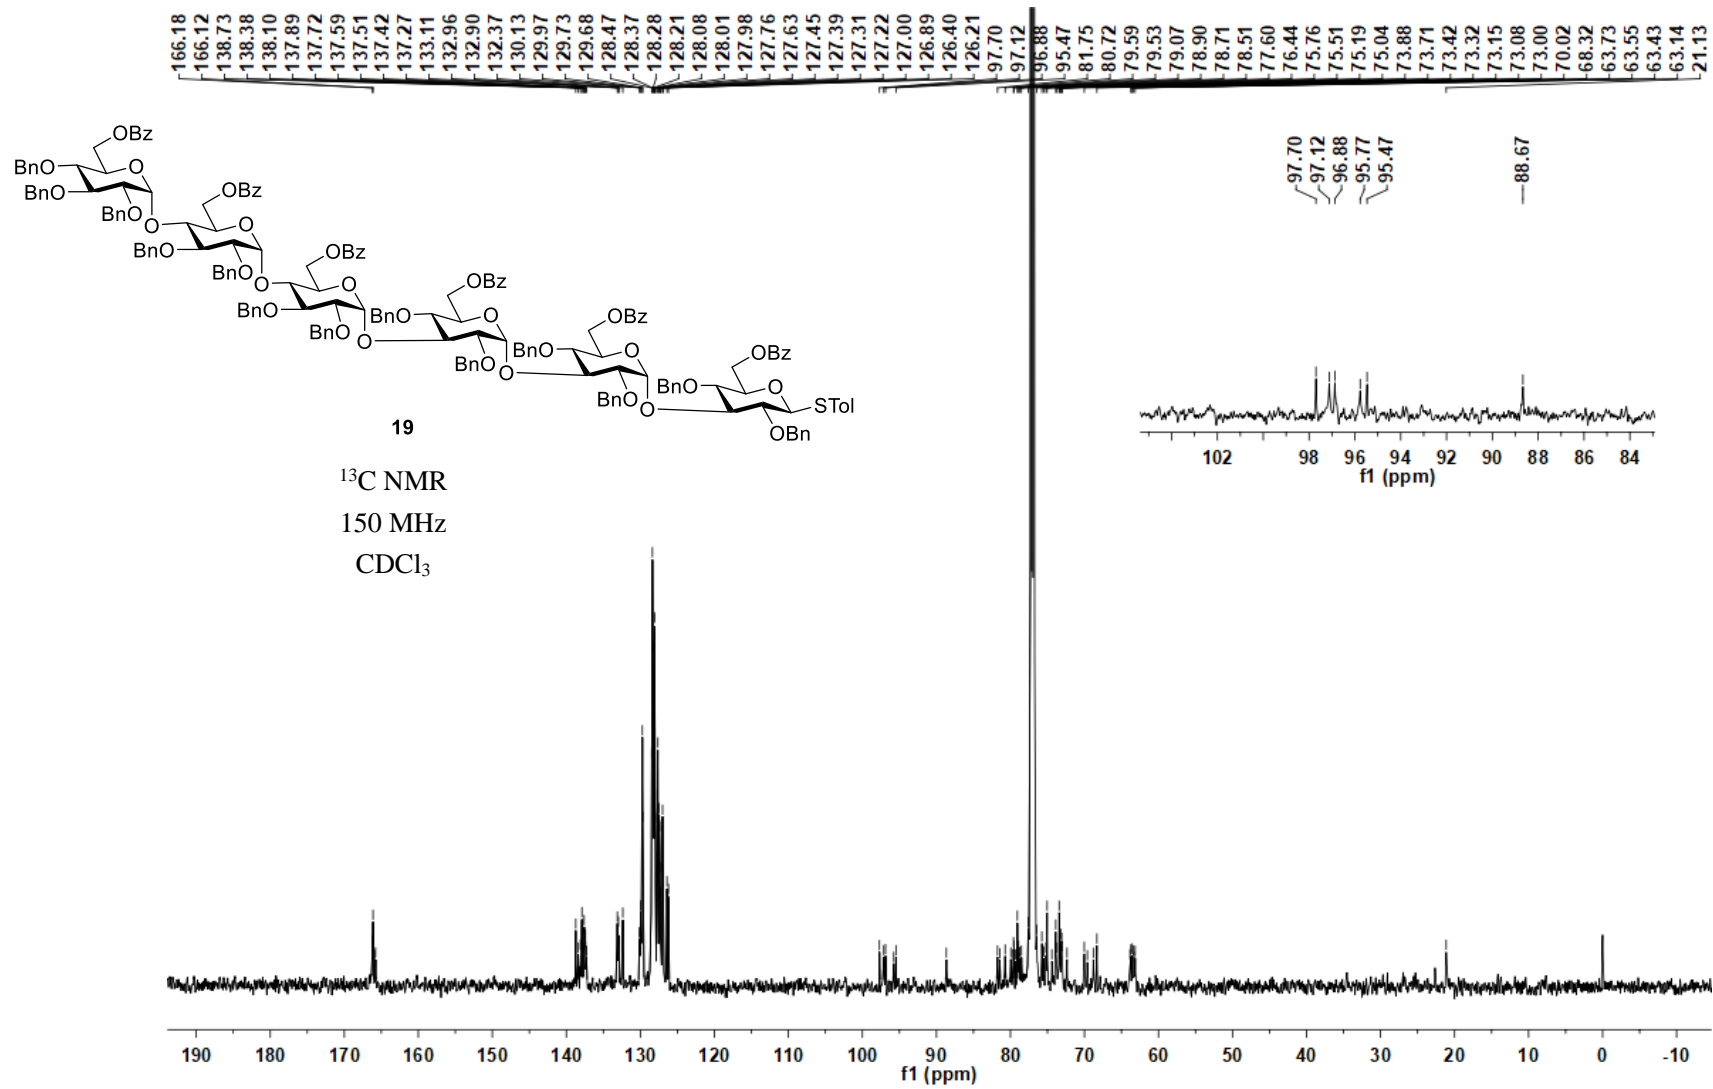





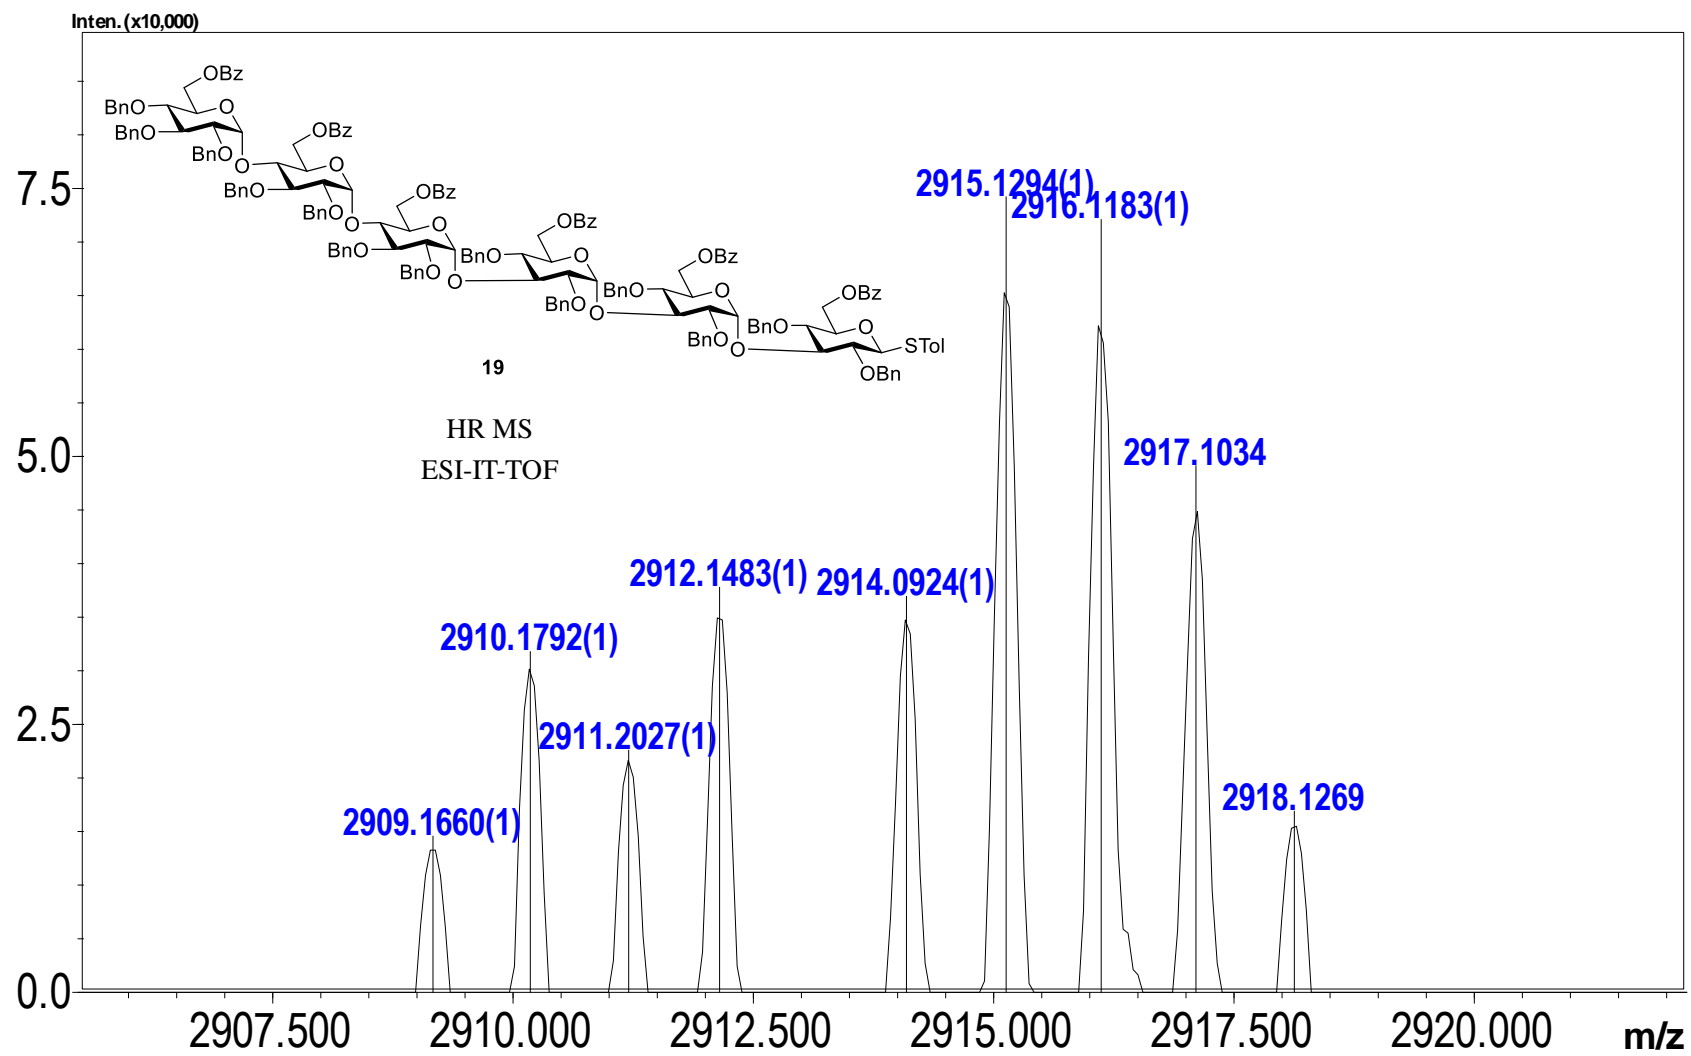

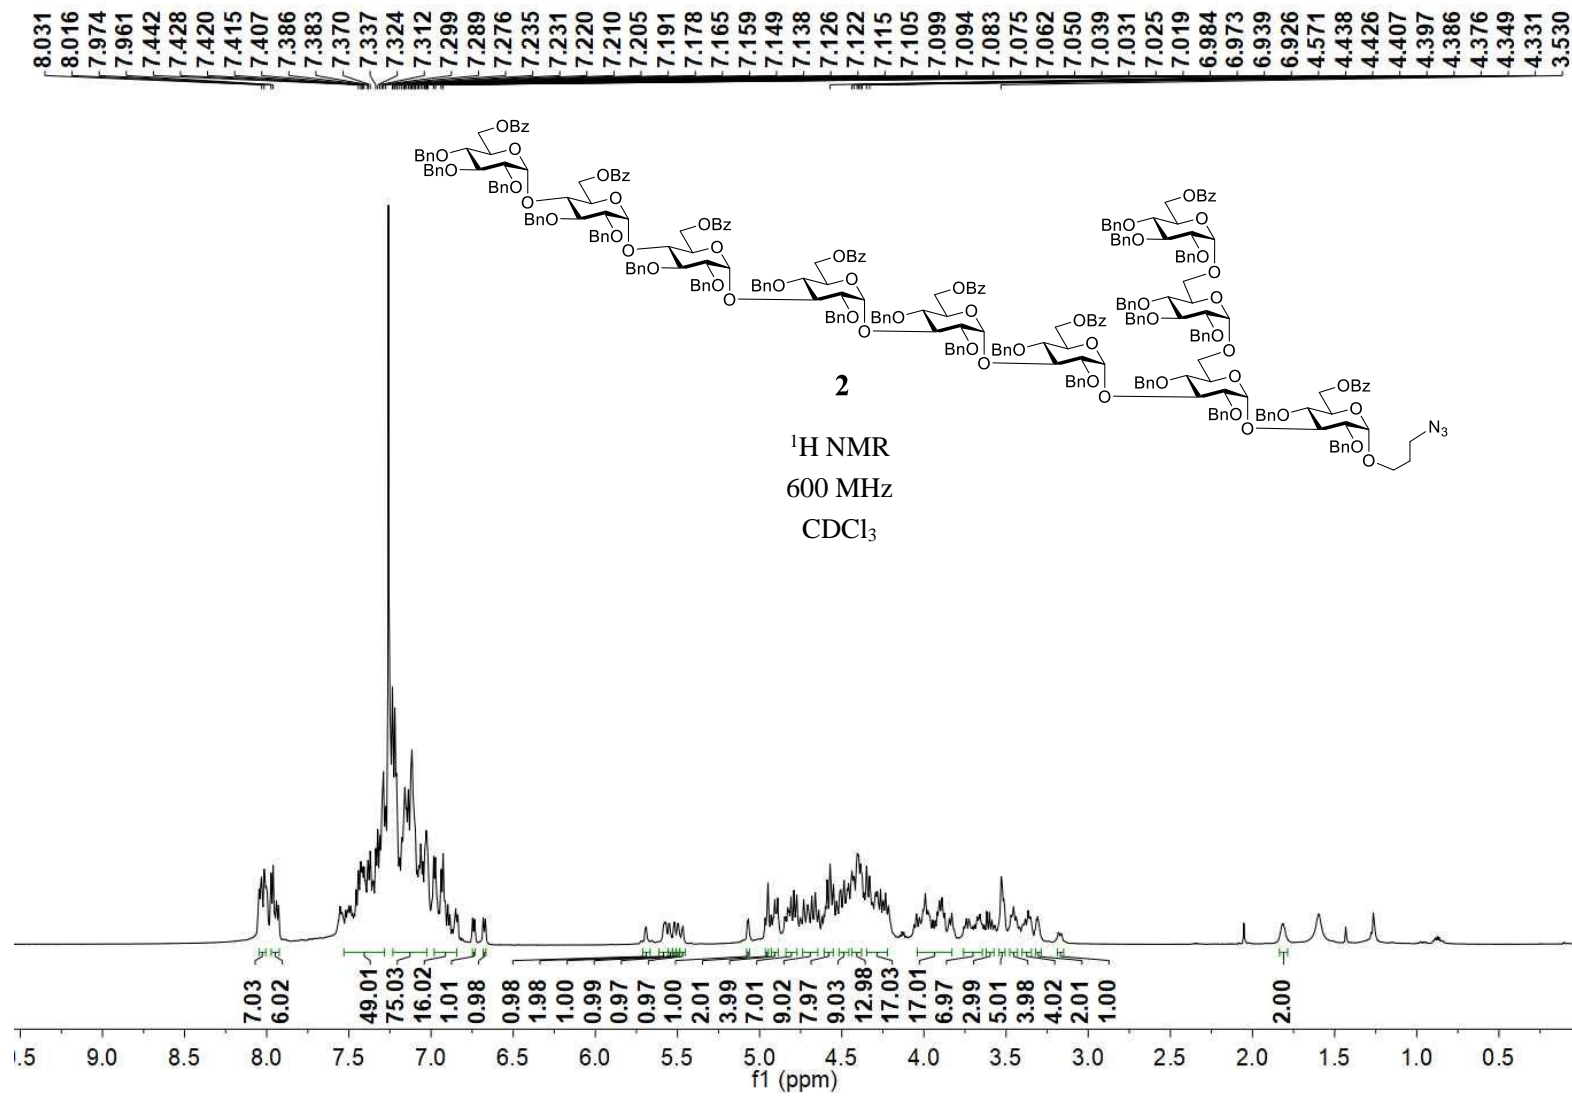

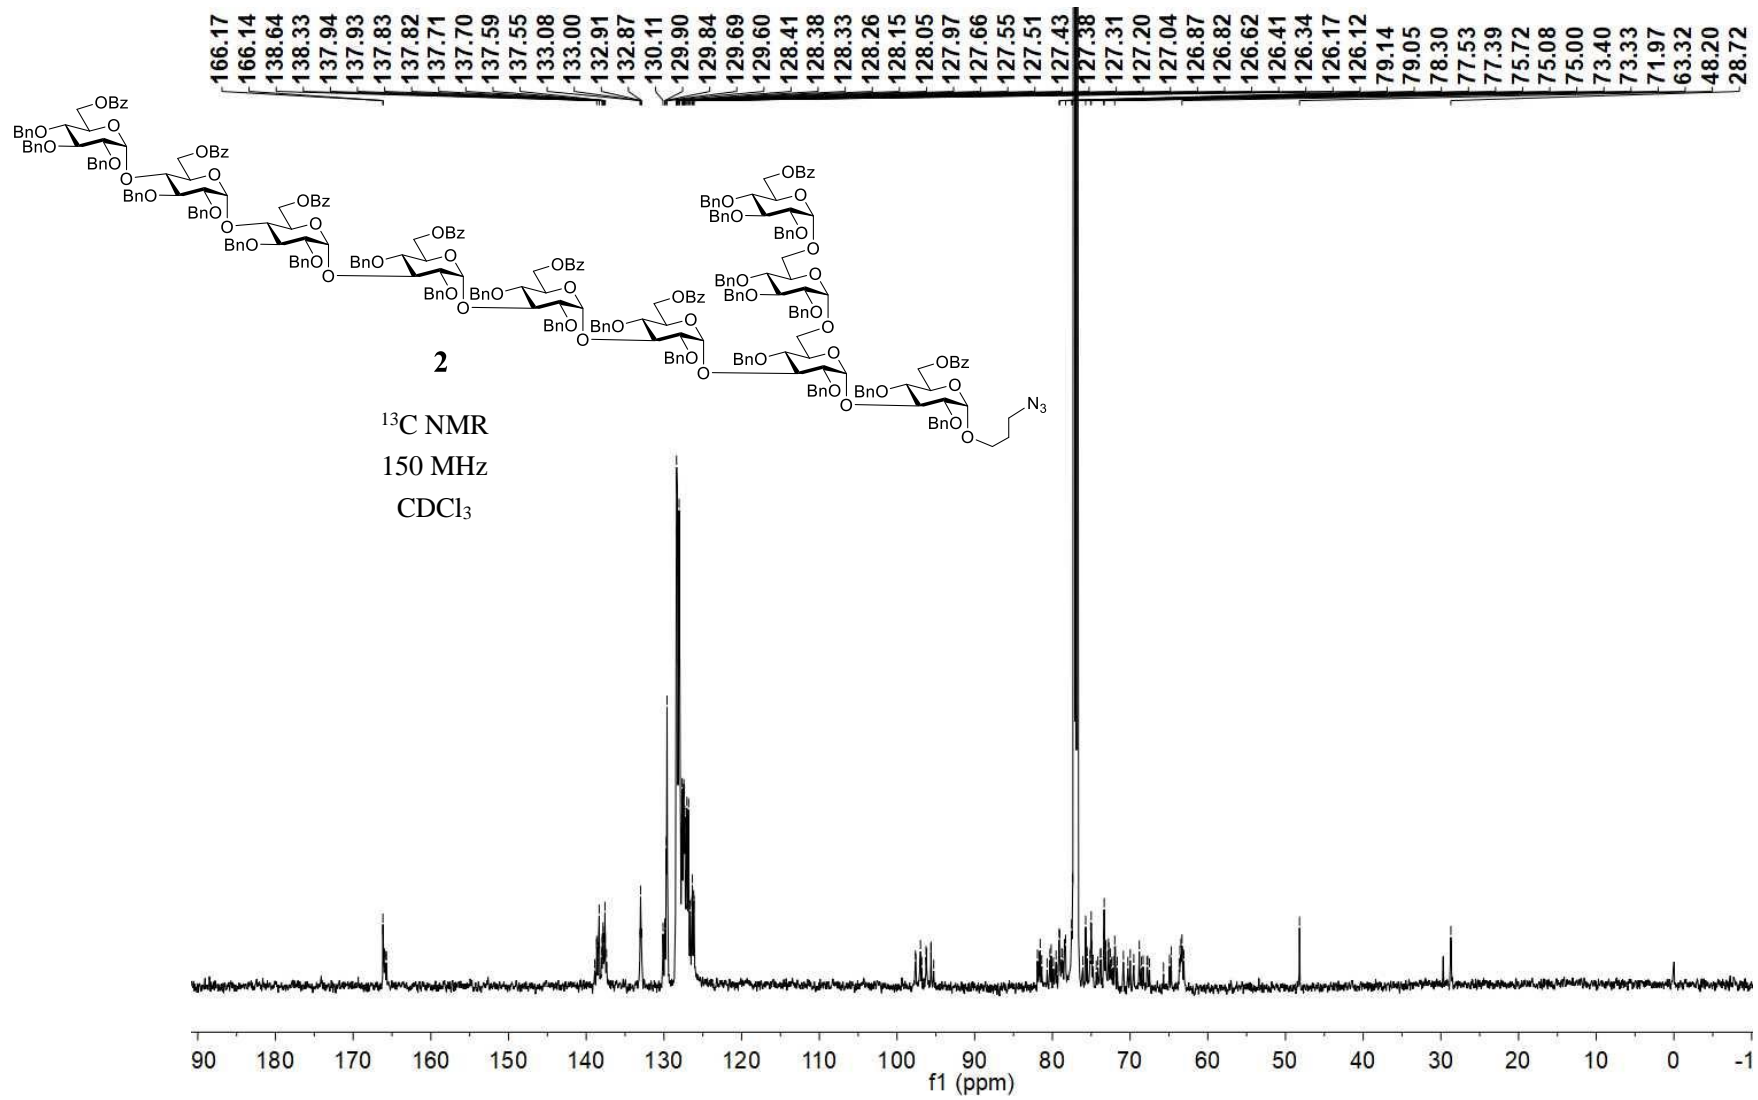



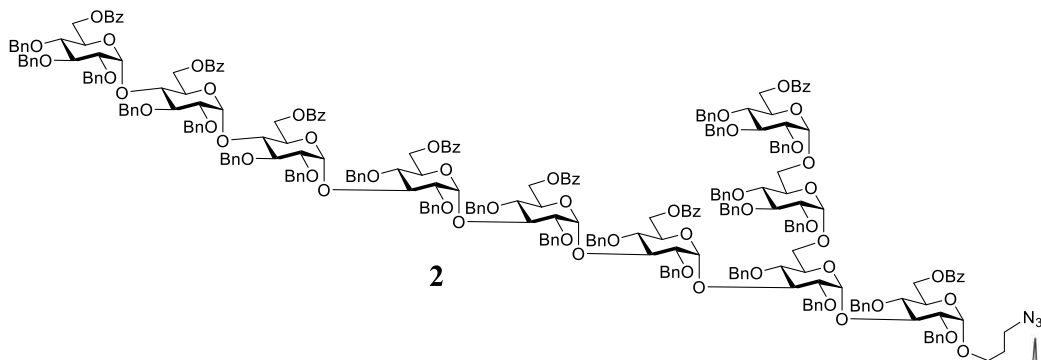

$^1\text{H}-^1\text{H}$  COSY  
600 MHz  
 $\text{CDCl}_3$

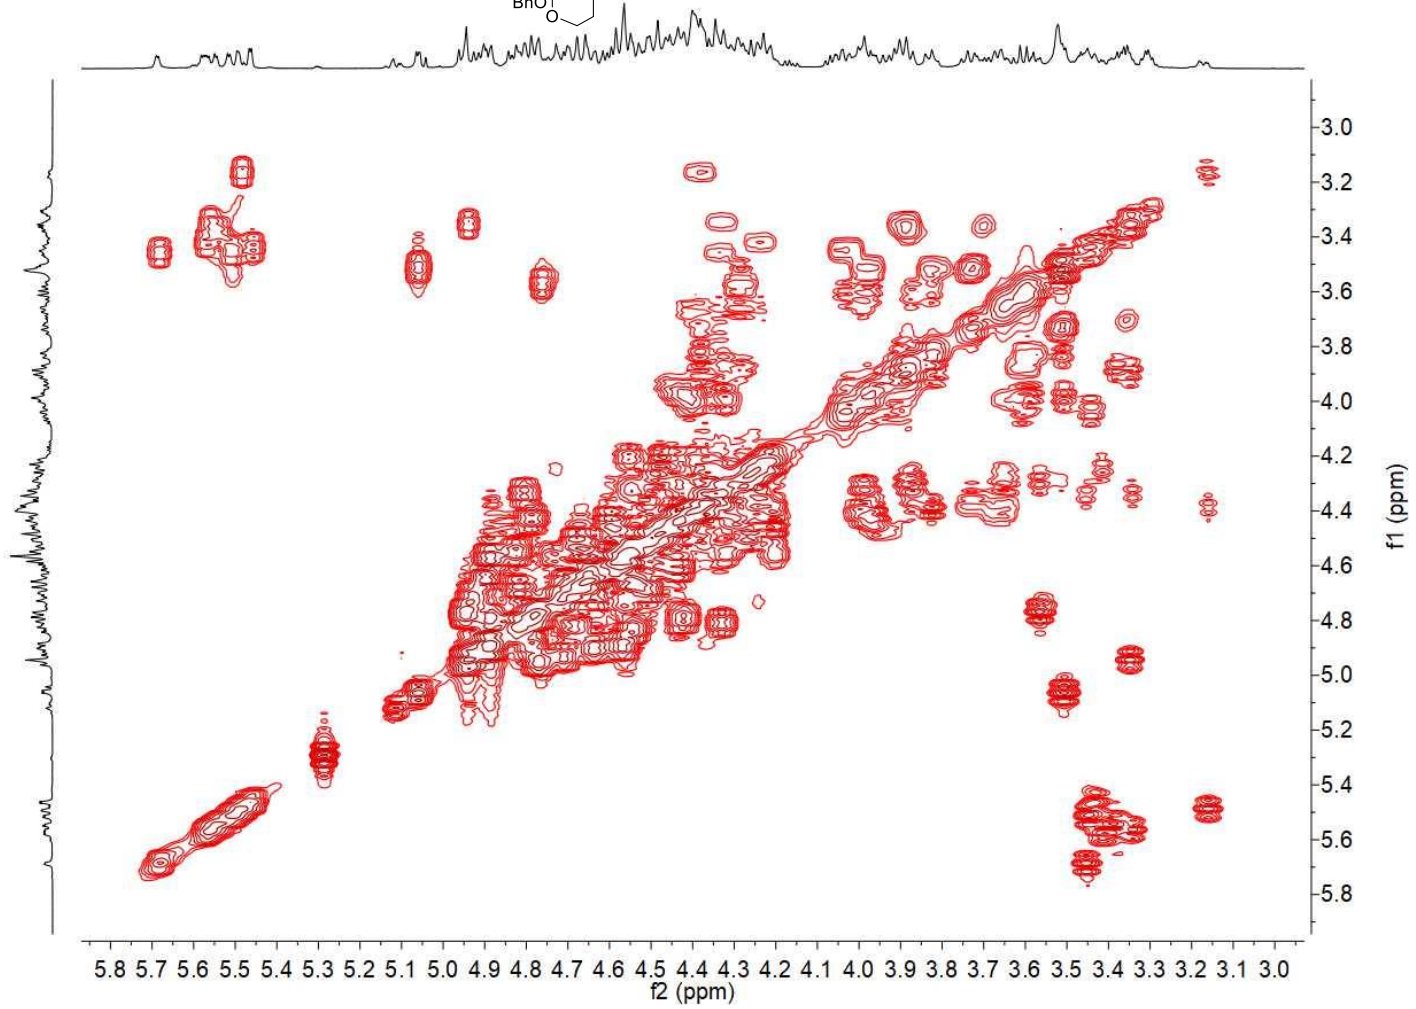

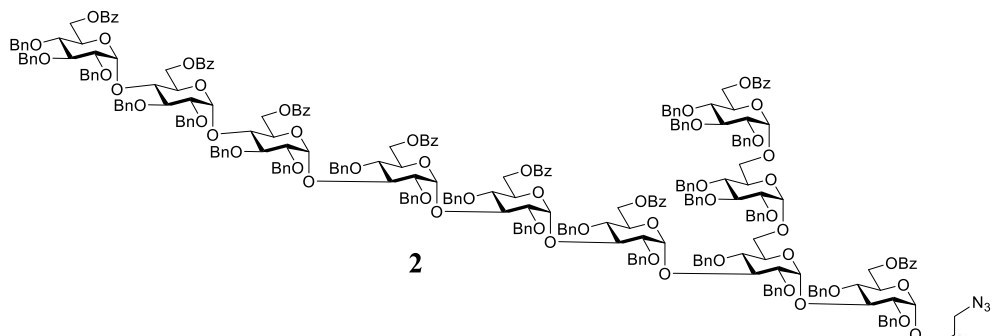

<sup>1</sup>H-<sup>13</sup>C HSQC  
600/150 MHz  
CDCl<sub>3</sub>

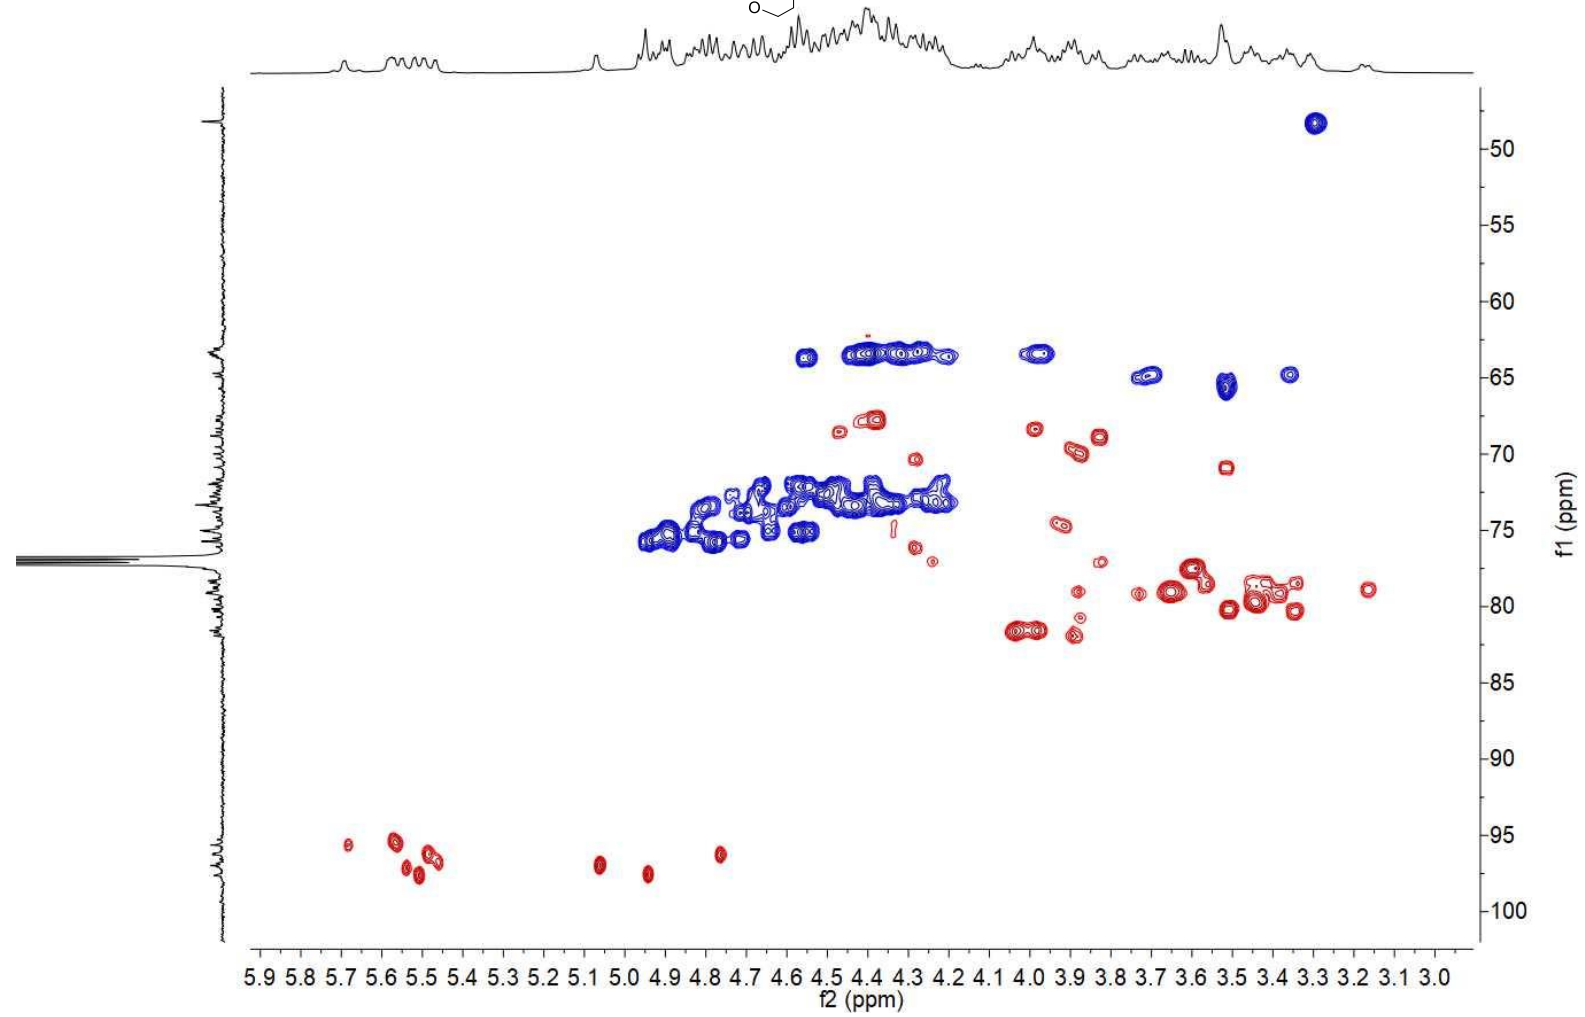

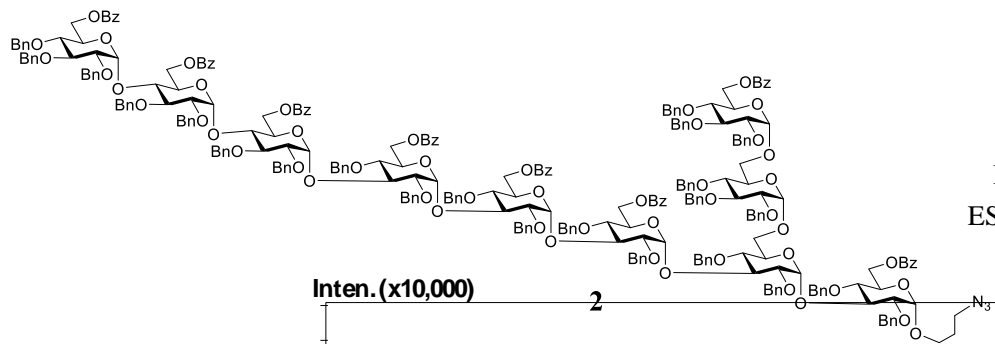

HR MS  
ESI-IT-TOF

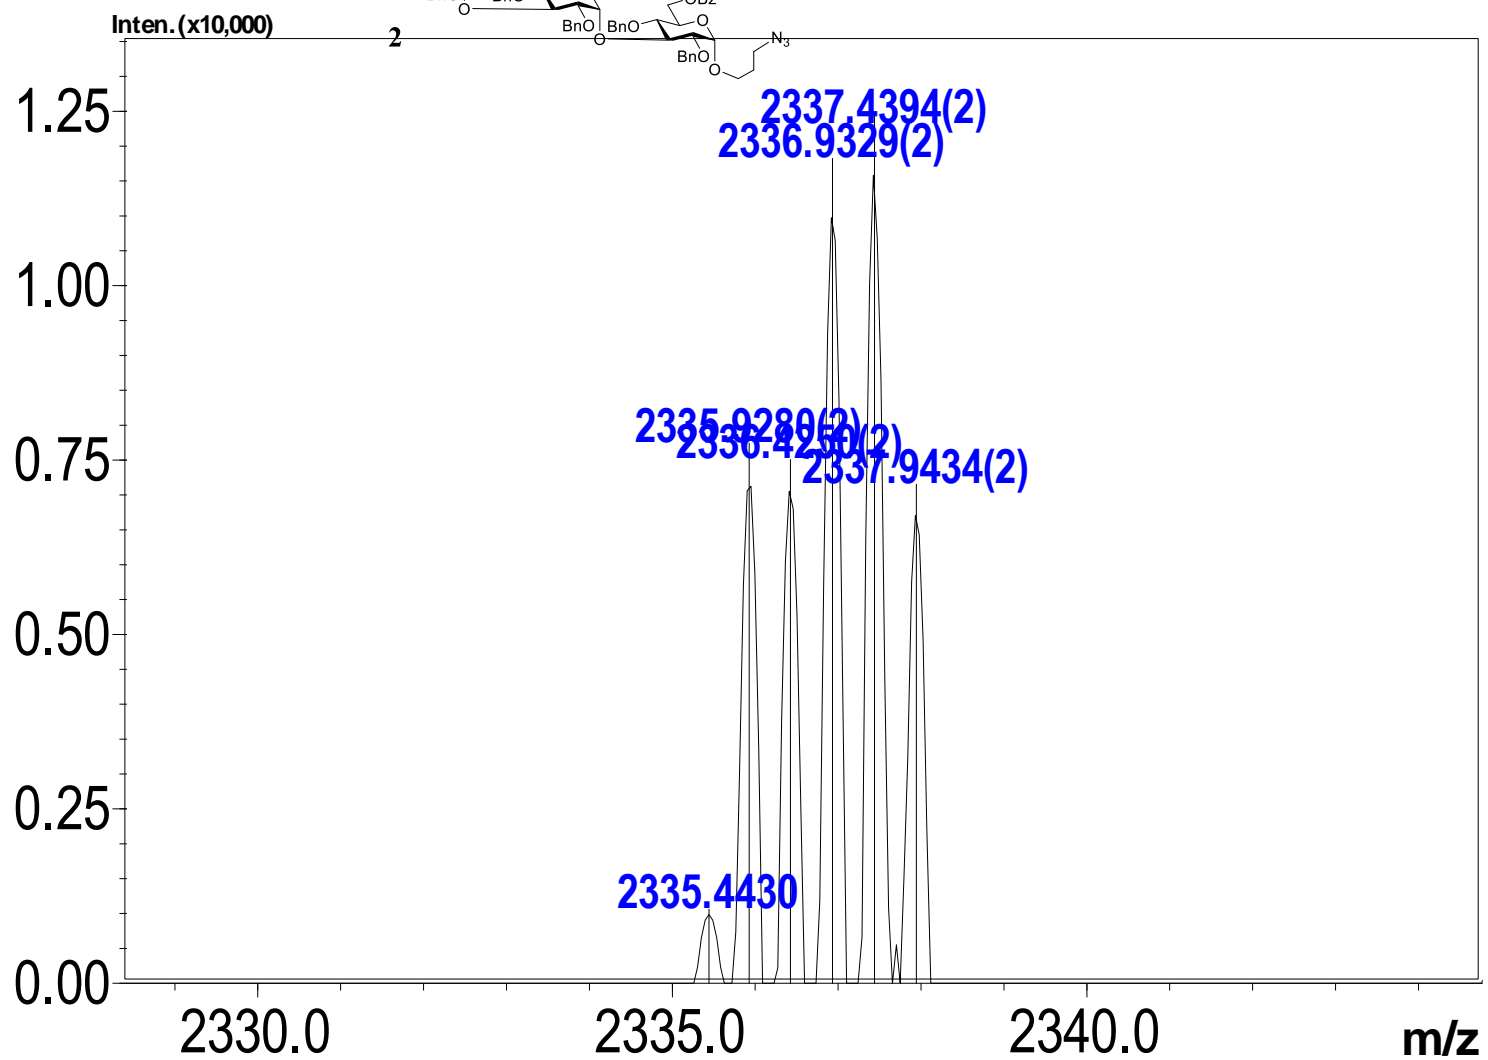

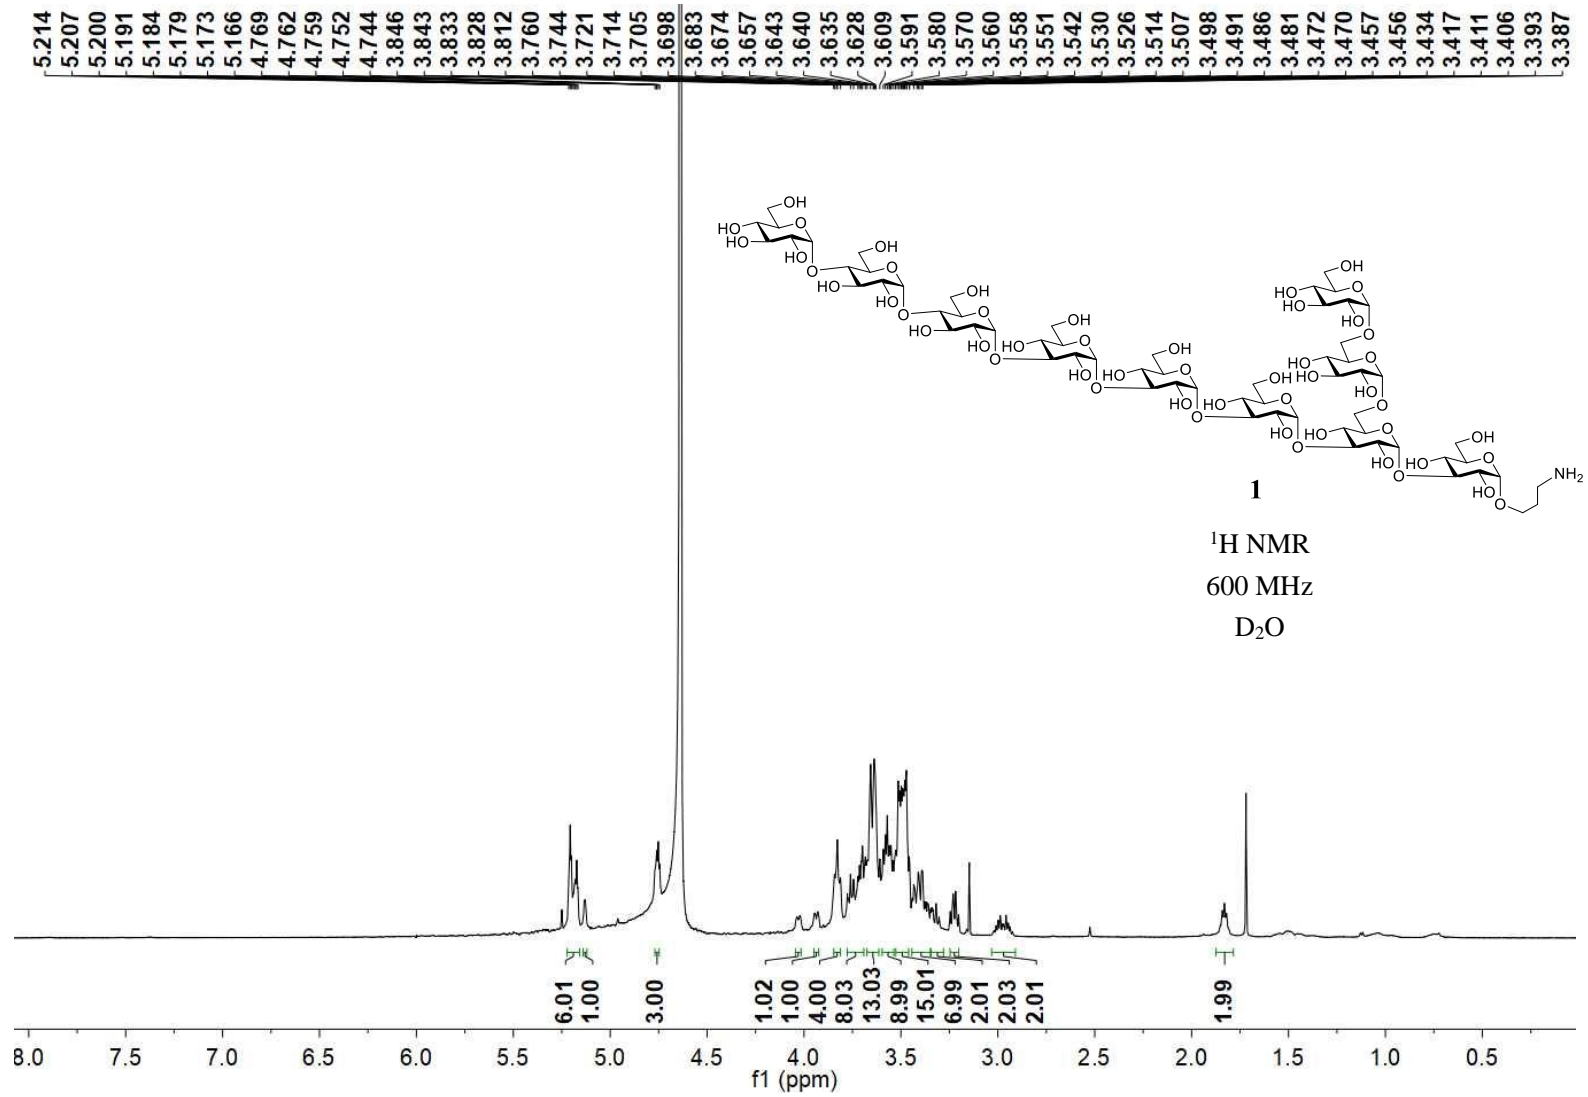

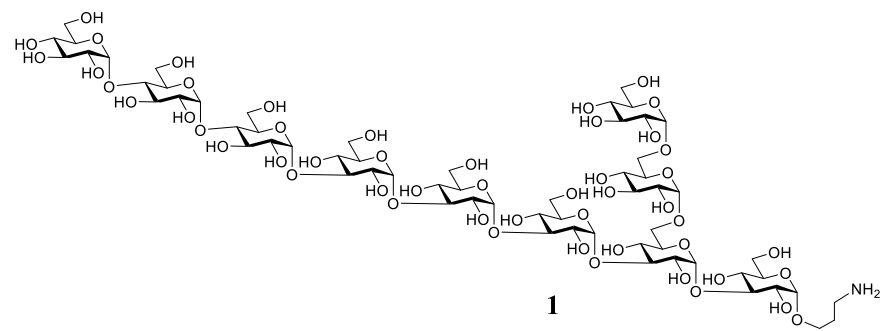

<sup>13</sup>C NMR  
150 MHz  
D<sub>2</sub>O

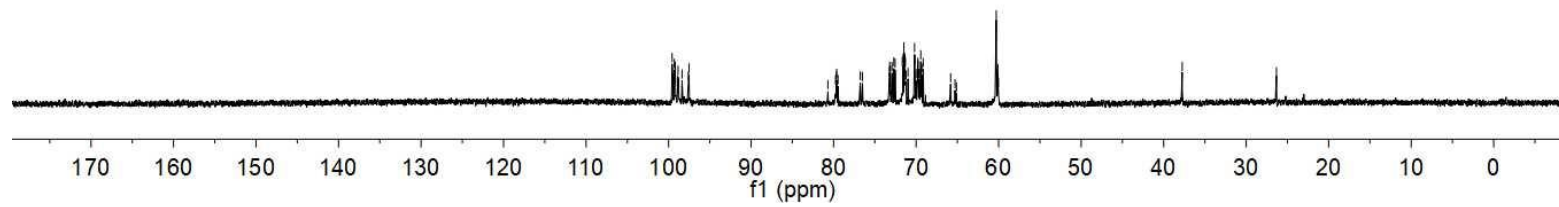

99.57  
99.46  
99.31  
99.22  
99.20  
98.93  
98.85  
98.37  
97.60  
97.52  
80.69  
79.76  
79.66  
79.63  
79.47  
76.76  
76.50  
73.24  
73.20  
73.12  
72.93  
72.70  
72.55  
71.67  
71.57  
71.48  
71.46  
71.42  
71.39  
71.33  
71.31  
71.23  
70.98  
70.19  
70.15  
70.00  
69.81  
69.79  
69.75  
69.71  
69.59  
69.44  
69.40  
69.31  
69.14  
68.84  
65.81  
65.28  
65.12  
60.29  
60.18  
60.09  
60.03  
37.75  
26.33

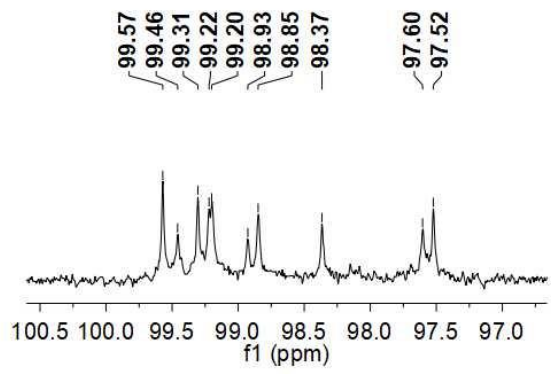

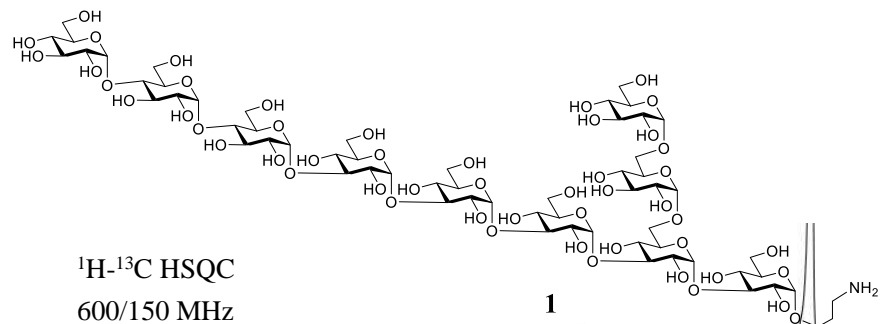

$^1\text{H}$ - $^{13}\text{C}$  HSQC  
600/150 MHz  
 $\text{D}_2\text{O}$

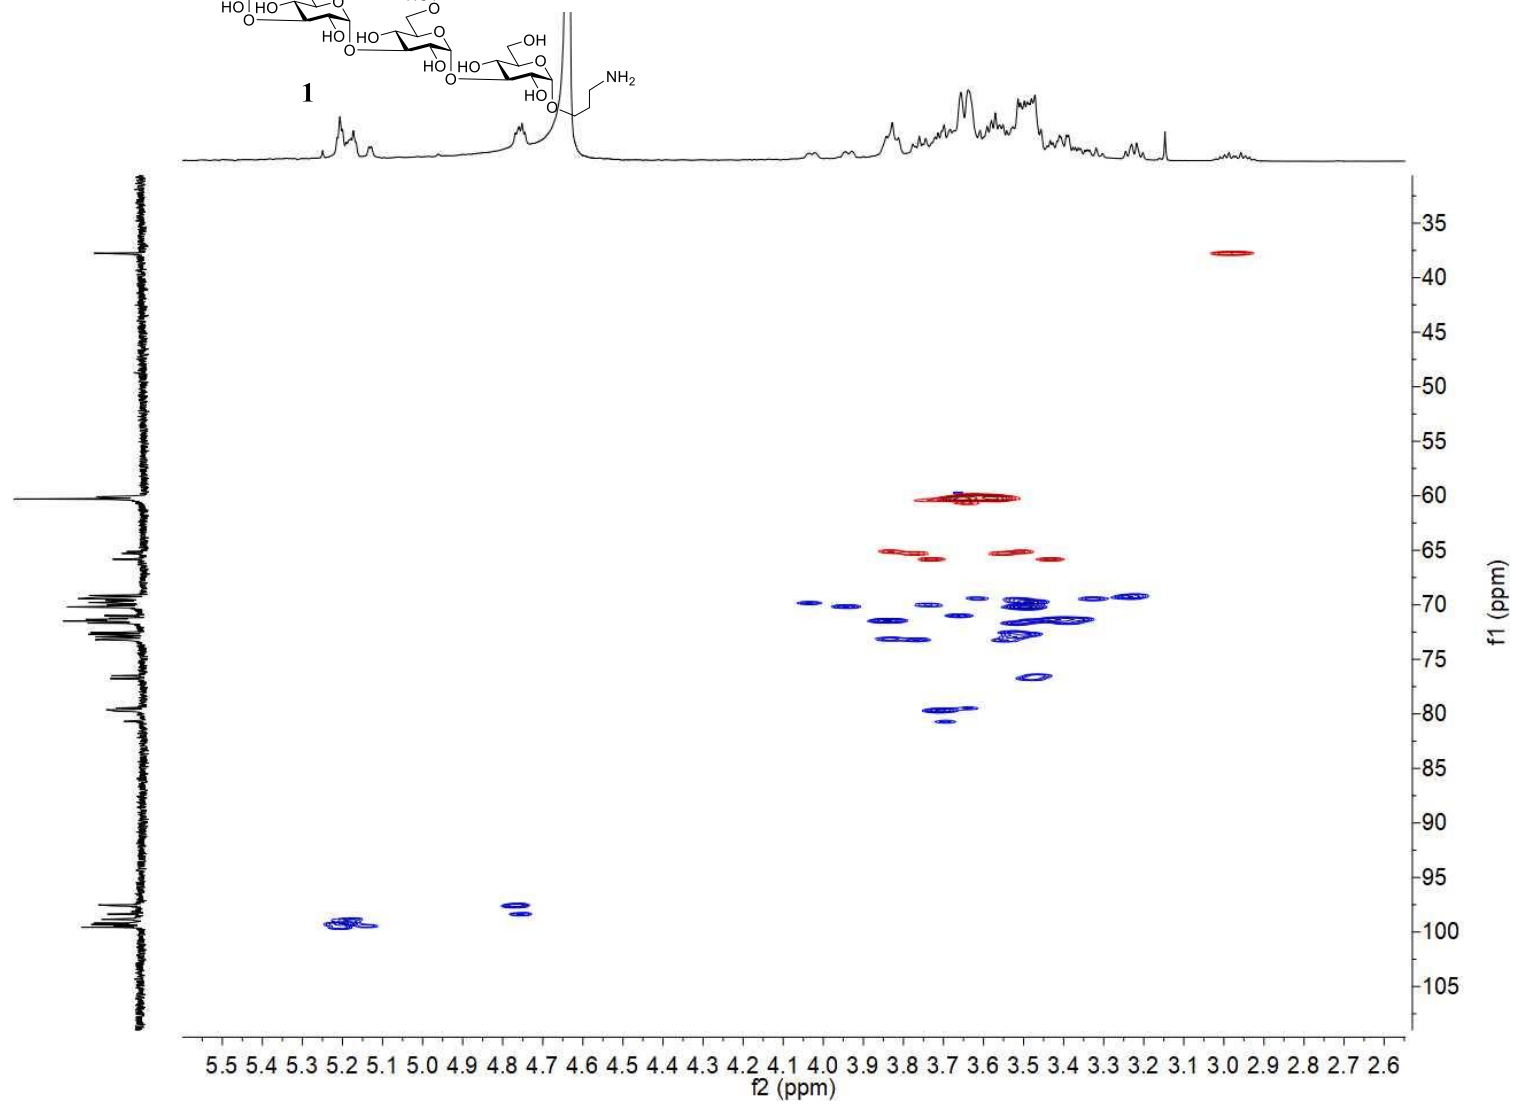

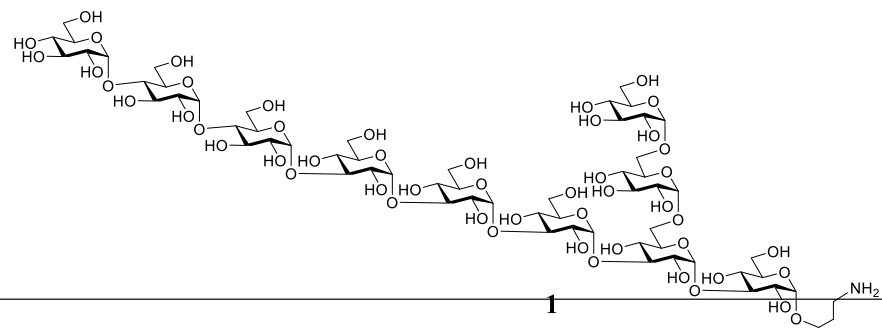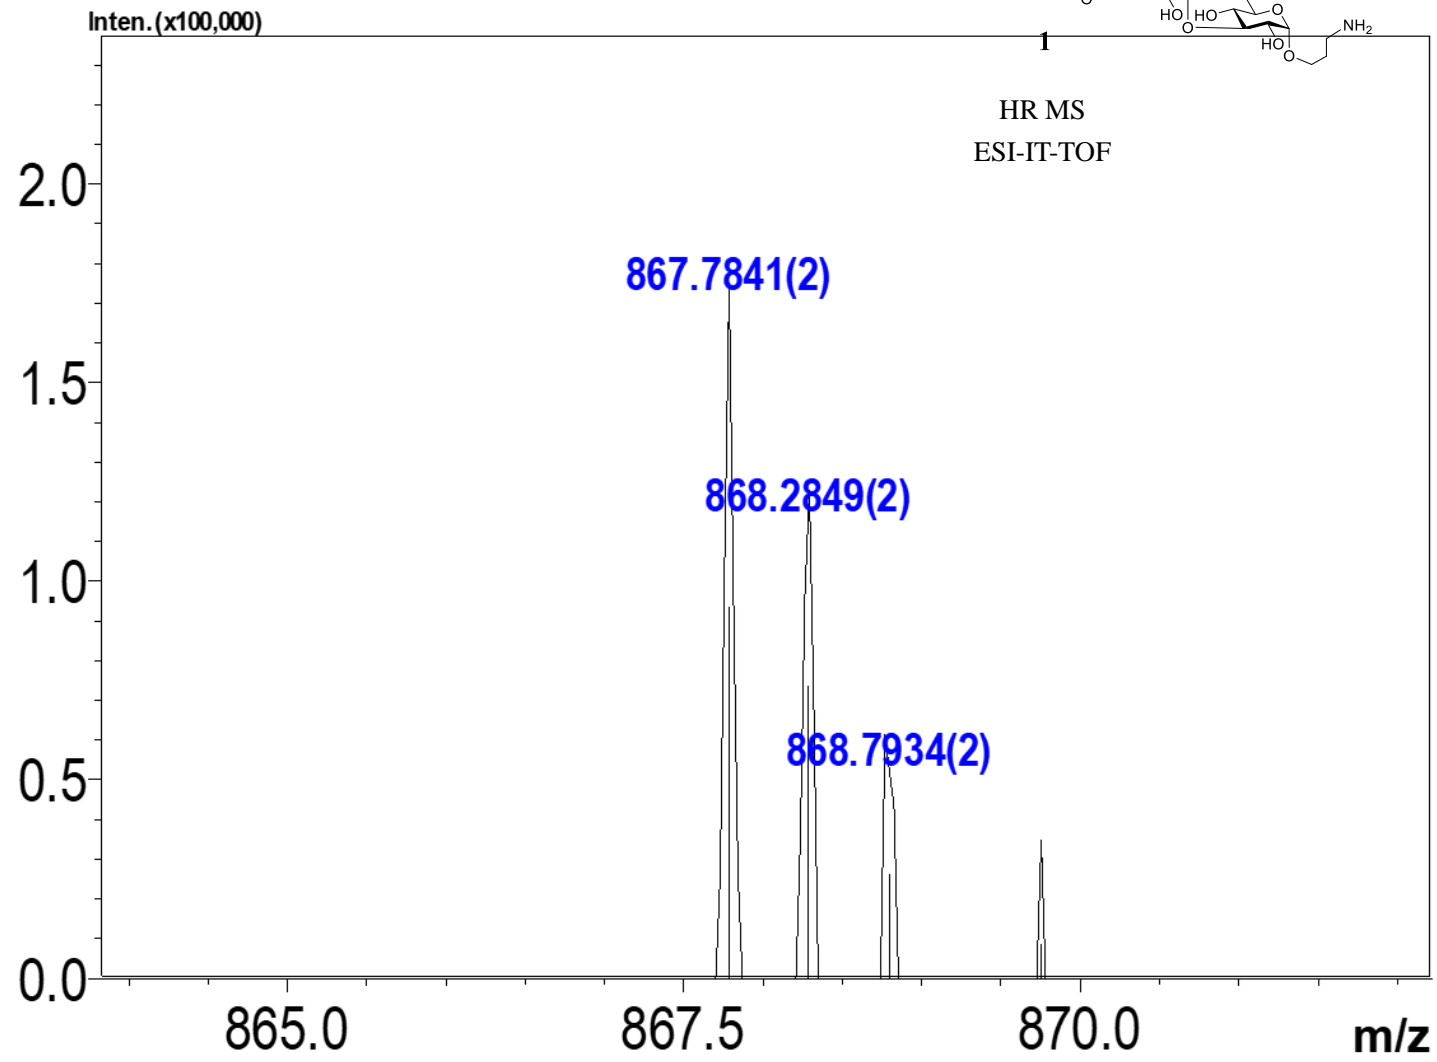

Supplement: d0ob01402h1.pdf [file d0ob01402h1.pdf]
